# Supplementary material for: Discovery of a dual-acting inhibitor of interleukin-1β and STATs for the treatment of inflammatory bowel disease
Source: Royal Society of Chemistry journal article supplement (doi:10.1039/d3md00451a), 2023-11-09
Supplement: d3md00451a1.pdf [file d3md00451a1.pdf]

## Discovery of a Dual-Acting Inhibitor of Interleukin-1 $\beta$ and STATs for the Treatment of Inflammatory Bowel Disease

Haowei Cai, <sup>#, †</sup> Zhuorong Liu, <sup>#, †</sup> Ping Sun, <sup>#, †</sup> Yinghua Zhou, <sup>†</sup> Yuyun Yan, <sup>†</sup> Yiming Luo, <sup>†</sup> Xiuxiu Zhang, <sup>†</sup> Ruiwen Wu, <sup>†</sup> Xiangting Liang, <sup>†</sup> Dan Wu, <sup>†</sup> Wenhui Hu, <sup>\*, †</sup> and Zhongjin Yang <sup>\*, †</sup>

<sup>†</sup>*Guangdong Provincial Key Laboratory of Molecular Target & Clinical Pharmacology, the NMPA and State Key Laboratory of Respiratory Disease, School of Pharmaceutical Sciences and the Fifth Affiliated Hospital, Guangzhou Medical University, Guangzhou 511436, China.*

### \*Corresponding Authors

Z. Yang – E-mail: yzj23@gzhmu.edu.cn.

W. Hu – E-mail: huwenhui@gzhmu.edu.cn.

## Supporting Information

### Table of Contents:

|                                                                    |    |
|--------------------------------------------------------------------|----|
| 1. The in vitro cytotoxicity profile for 10v .....                 | 2  |
| 2. Copies of the <sup>1</sup> H/ <sup>13</sup> C NMR spectra ..... | 3  |
| 2. Copies of the HRMS .....                                        | 23 |
| 4. HPLC spectrum of 10v .....                                      | 33 |

# 1. The in vitro cytotoxicity profile for 10v

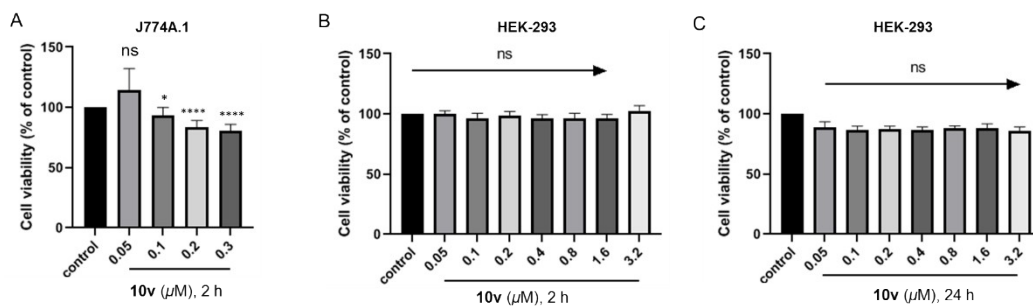

Figure S1. The cell viability detection of 10v using CCK8 assay.



### <sup>1</sup>H NMR spectrum of **10b** in DMSO

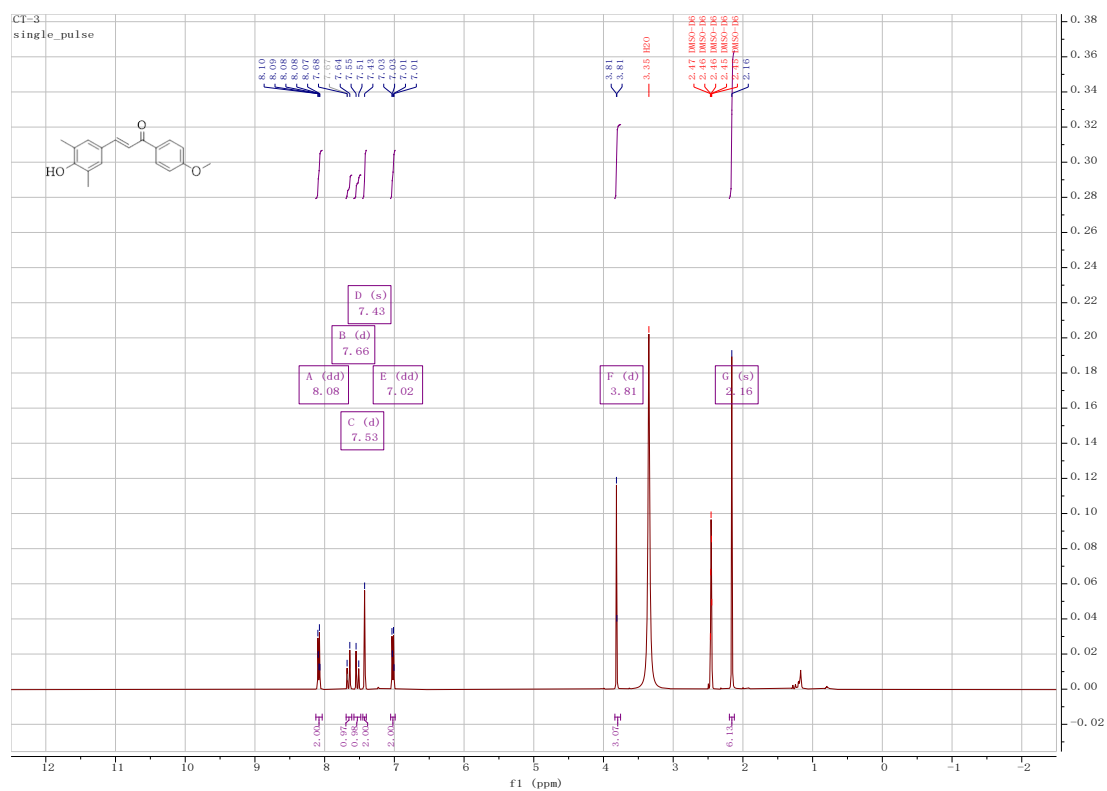

### <sup>13</sup>C NMR spectrum of **10b** in DMSO

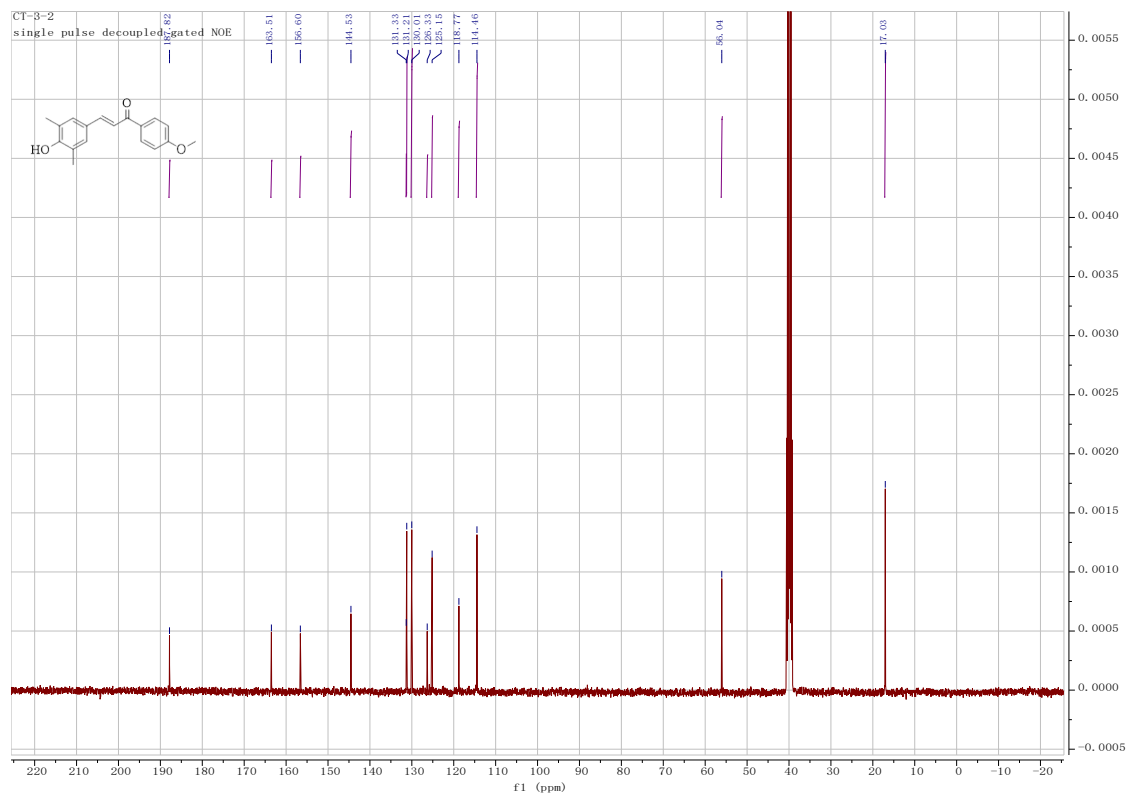

### <sup>1</sup>HNMR spectrum of 10c in DMSO

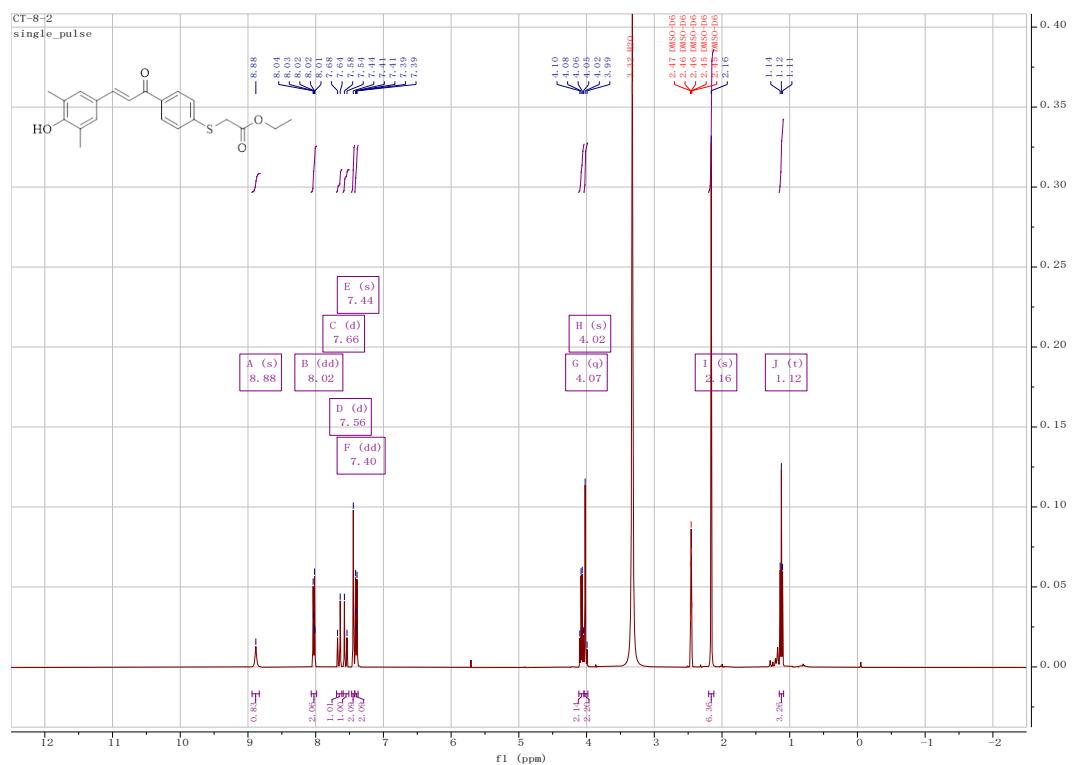

### <sup>13</sup>CNMR spectrum of 10c in DMSO

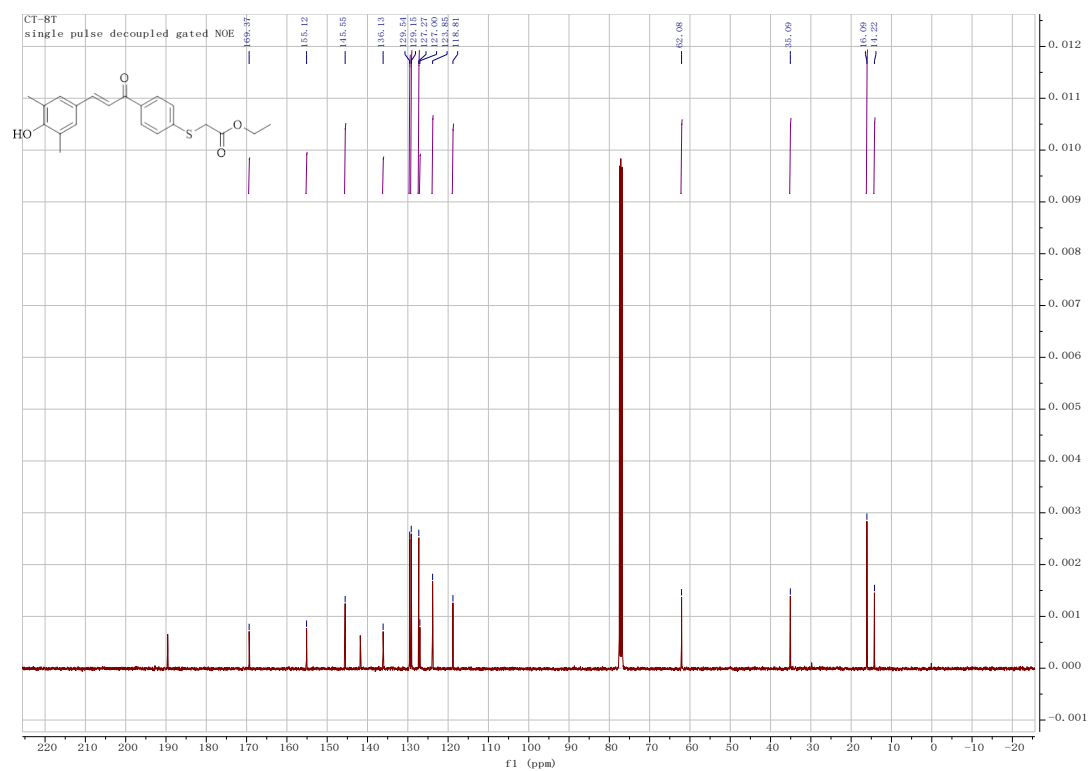

<sup>1</sup>H NMR spectrum of **10d** in DMSO

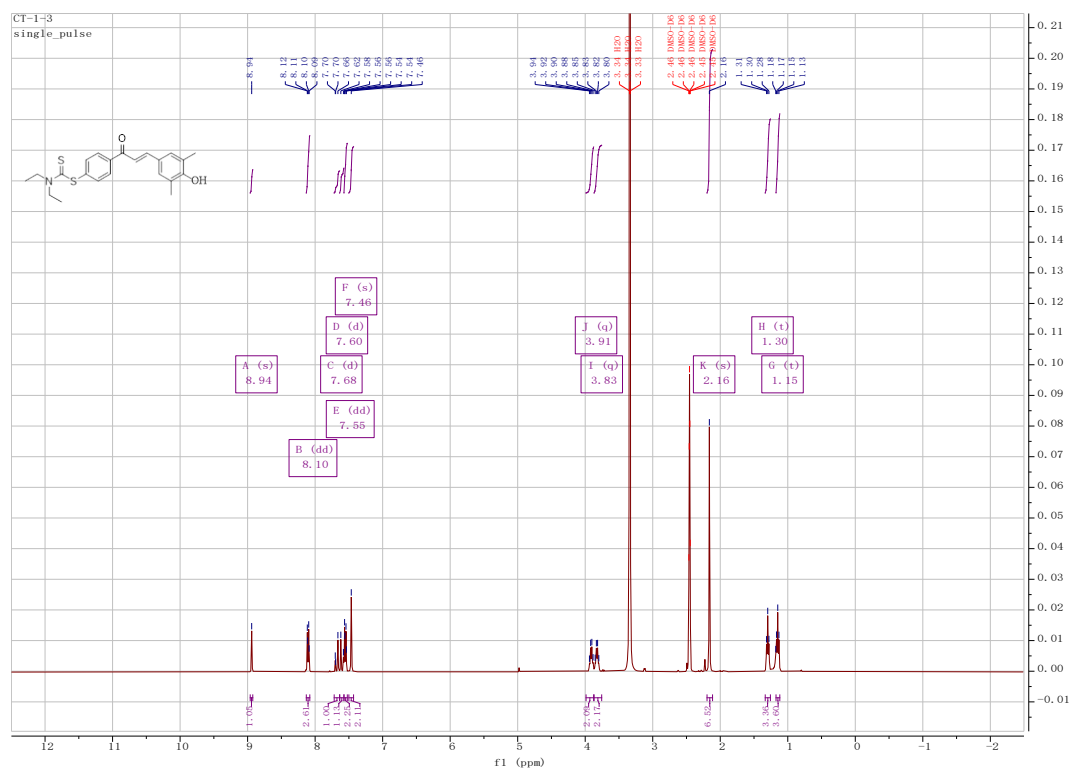

<sup>13</sup>C NMR spectrum of **10d** in DMSO

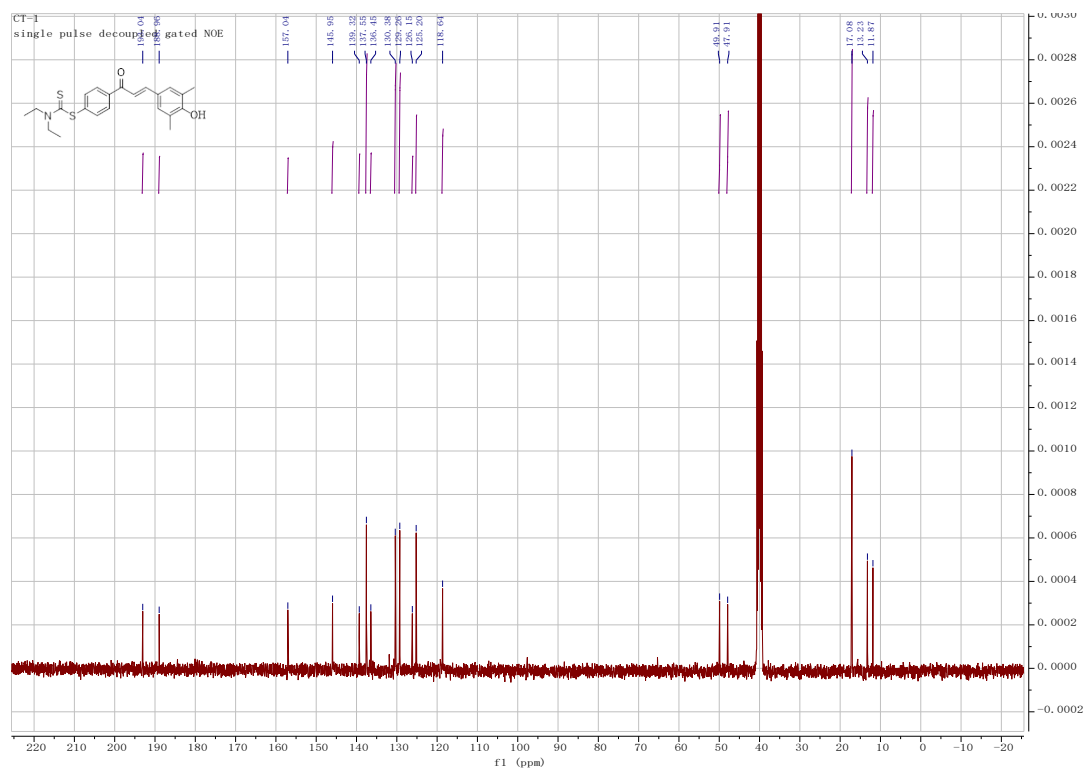

### <sup>1</sup>H NMR spectrum of **10f** in DMSO

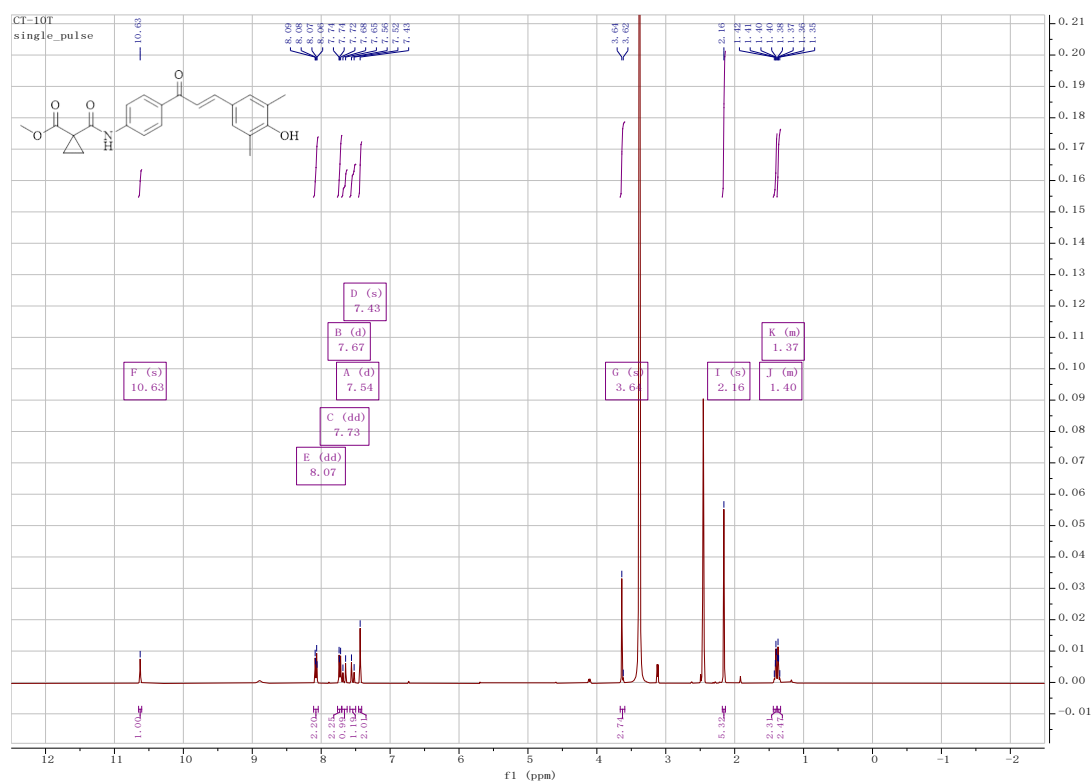

### <sup>13</sup>C NMR spectrum of **10f** in DMSO

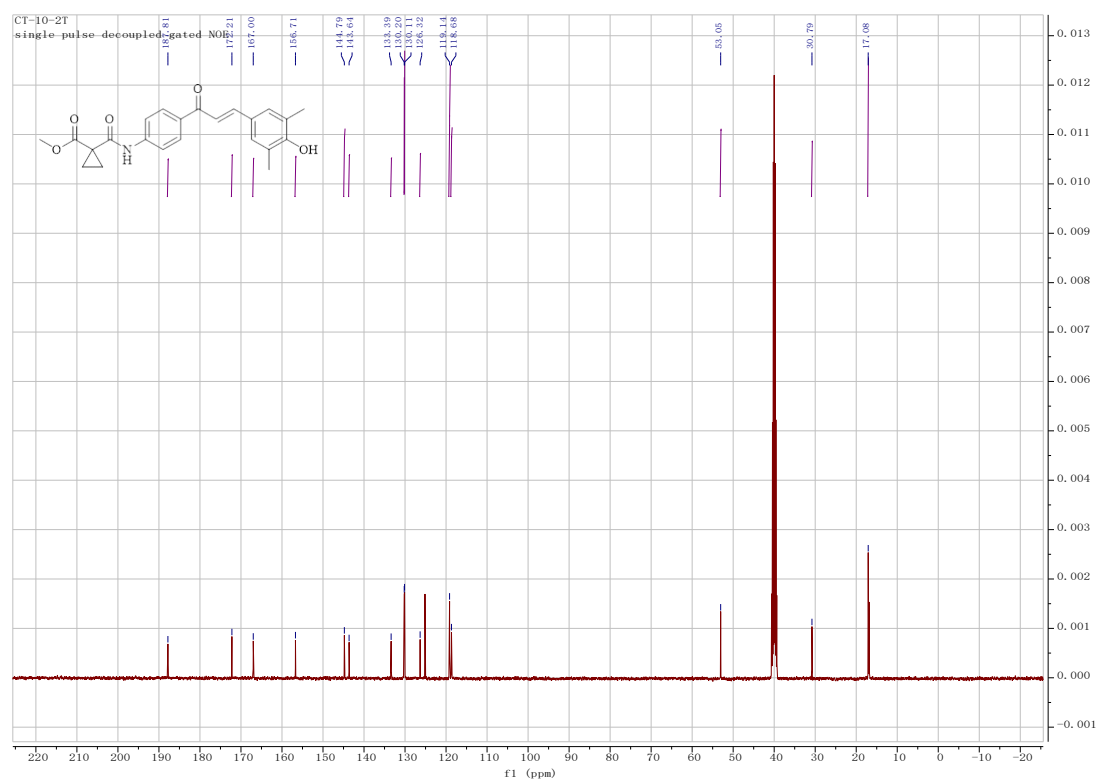

<sup>1</sup>H NMR spectrum of **10h** in DMSO

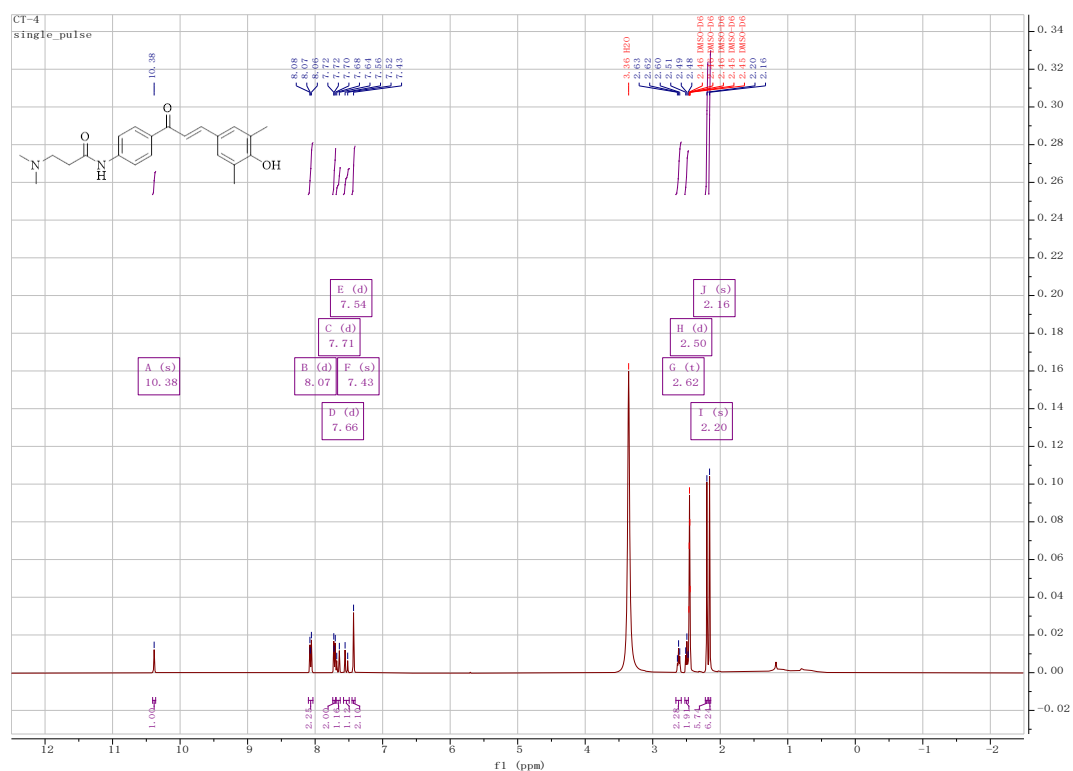

<sup>13</sup>C NMR spectrum of **10h** in DMSO

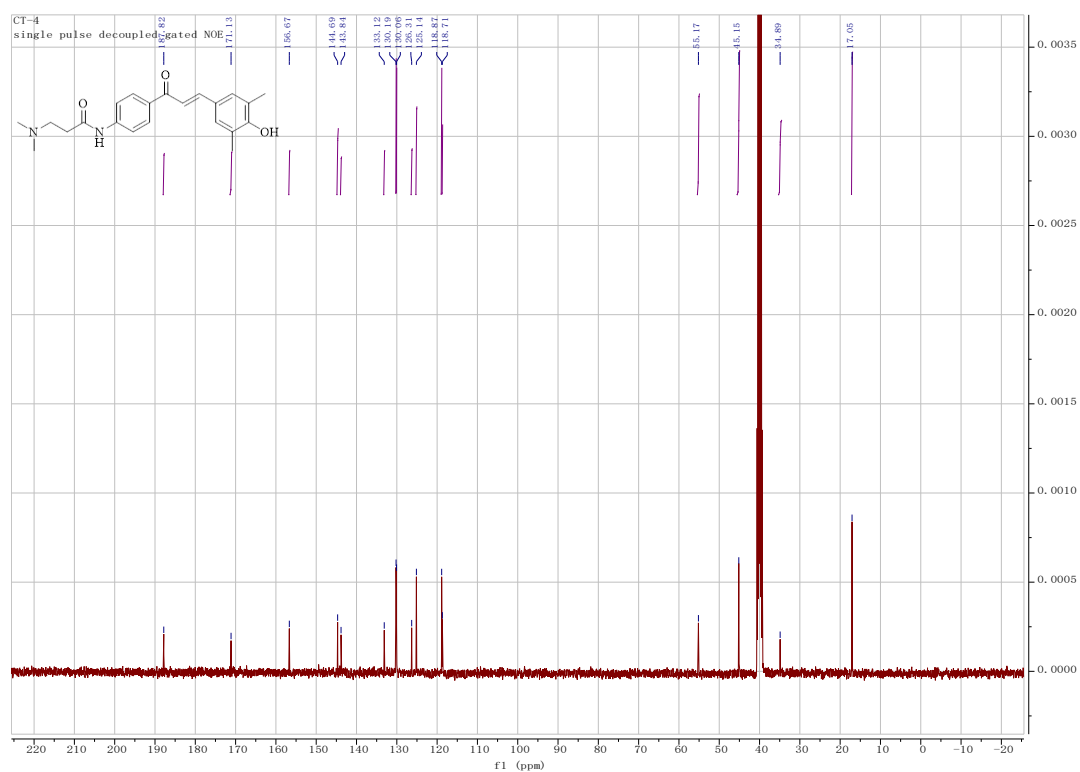



# <sup>1</sup>H NMR spectrum of **10i** in DMSO

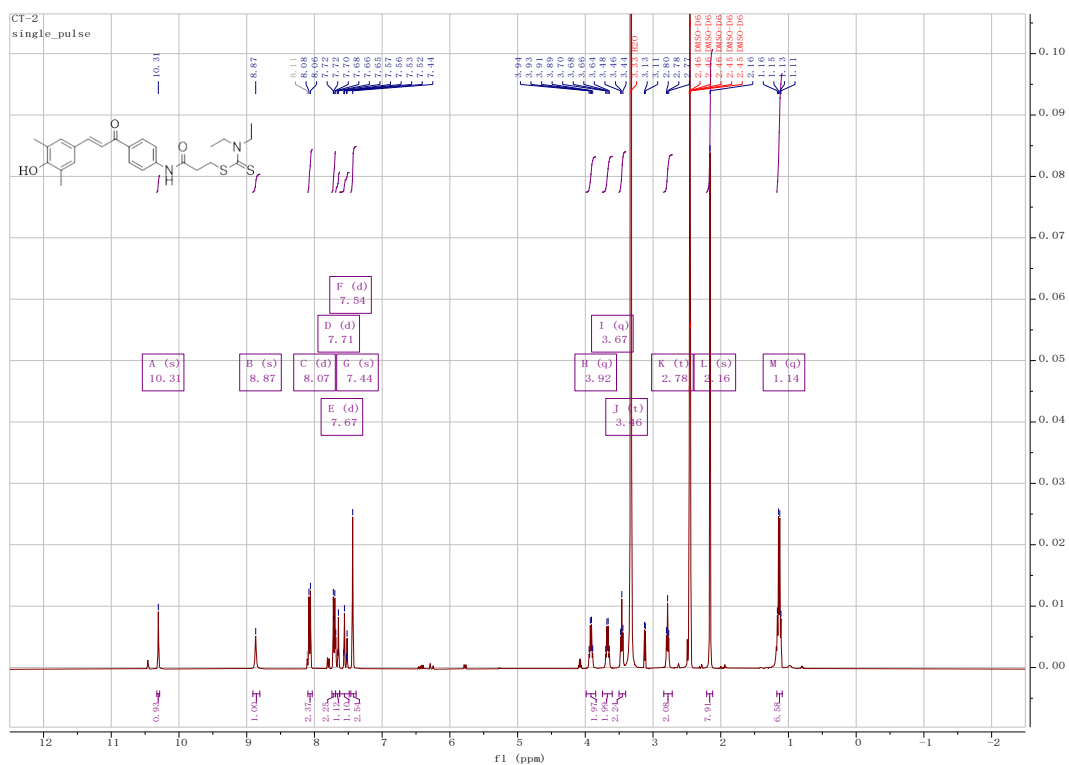

# <sup>13</sup>C NMR spectrum of **10i** in DMSO

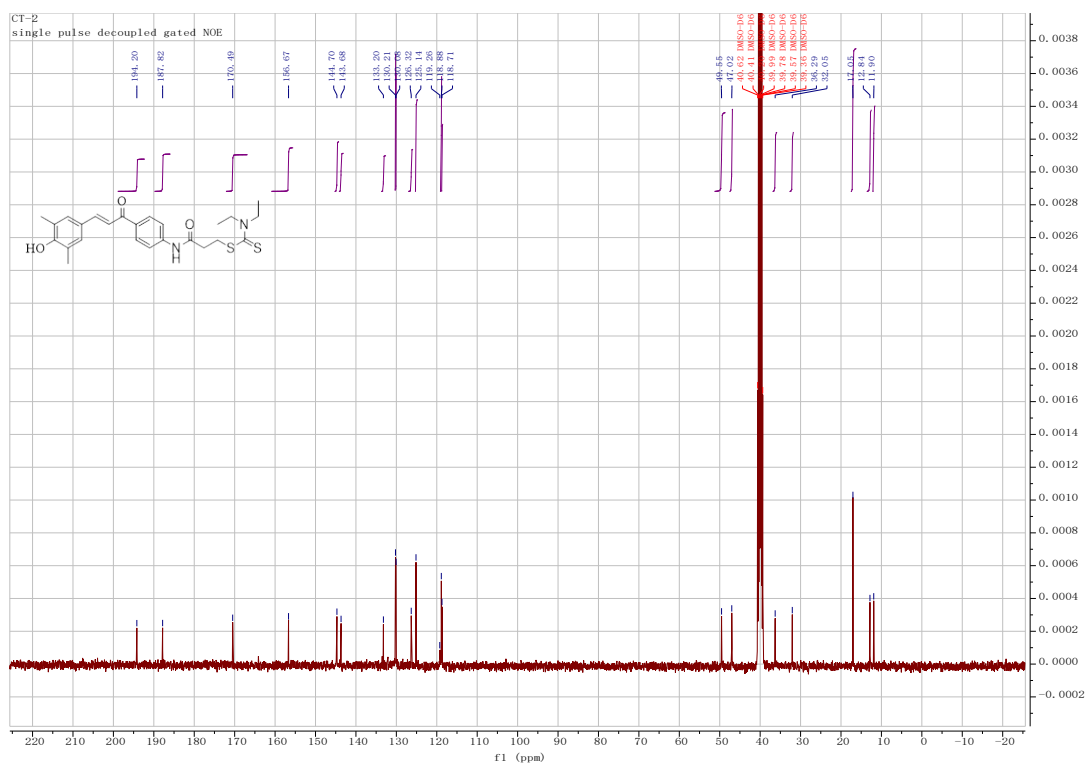

# $^1\text{H}$ NMR spectrum of **10j** in DMSO

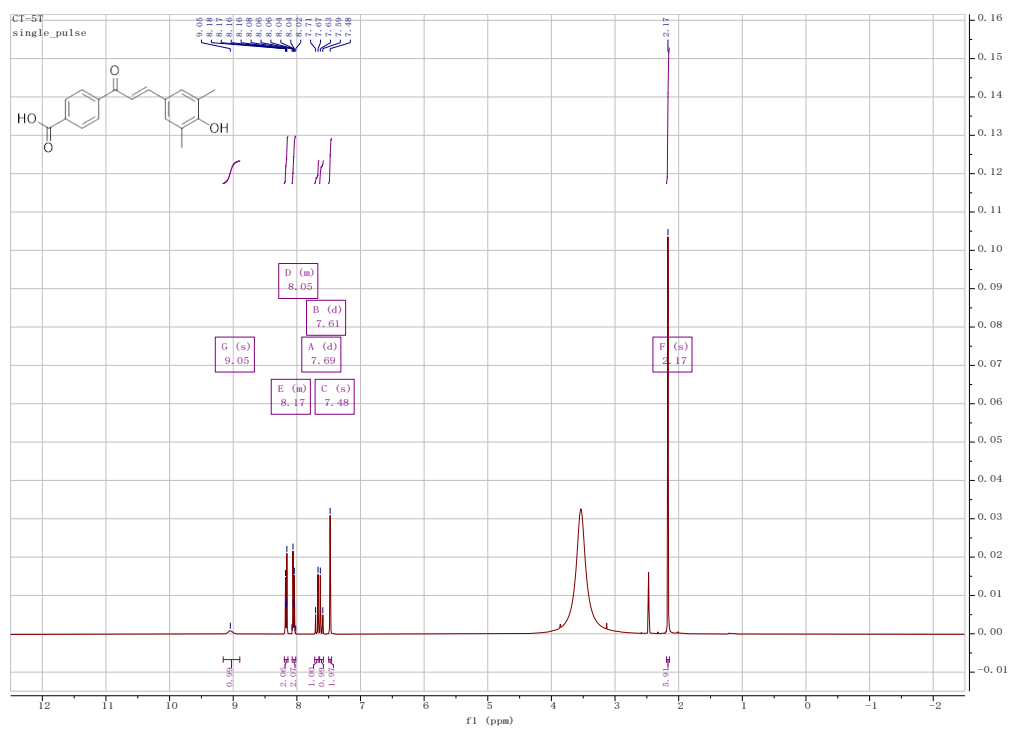

# $^{13}\text{C}$ NMR spectrum of **10j** in DMSO

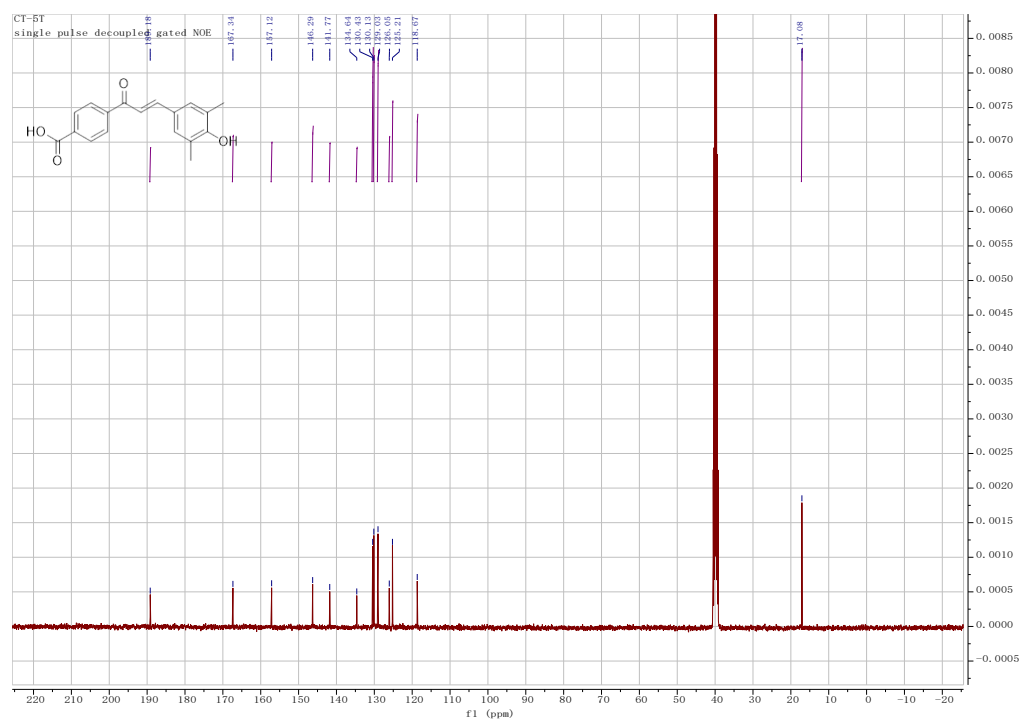

<sup>1</sup>H NMR spectrum of **10k** in CD<sub>3</sub>OD

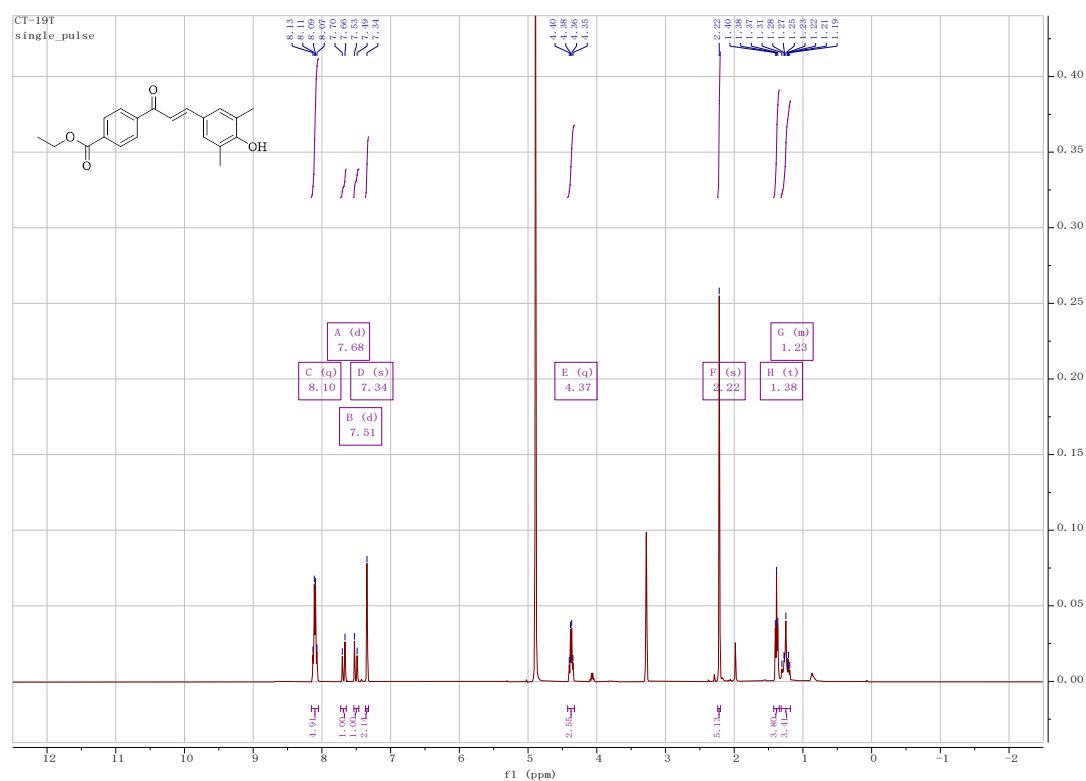

<sup>13</sup>C NMR spectrum of **10k** in DMSO

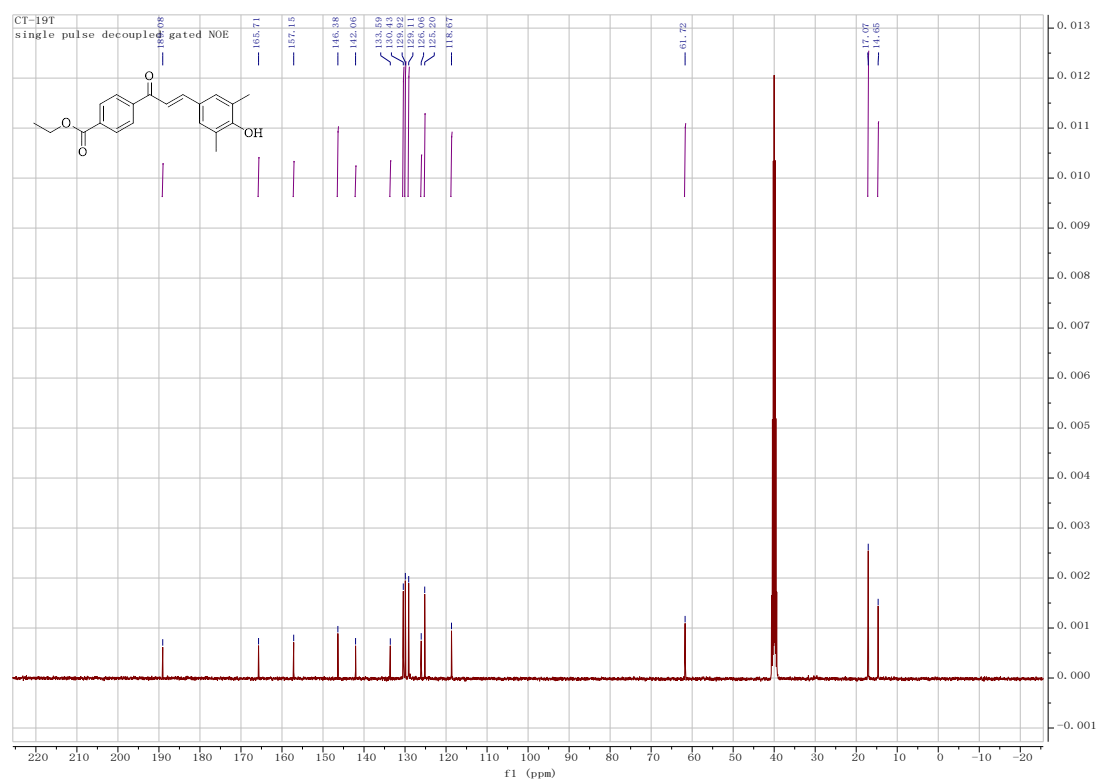

# <sup>1</sup>H NMR spectrum of **101** in DMSO

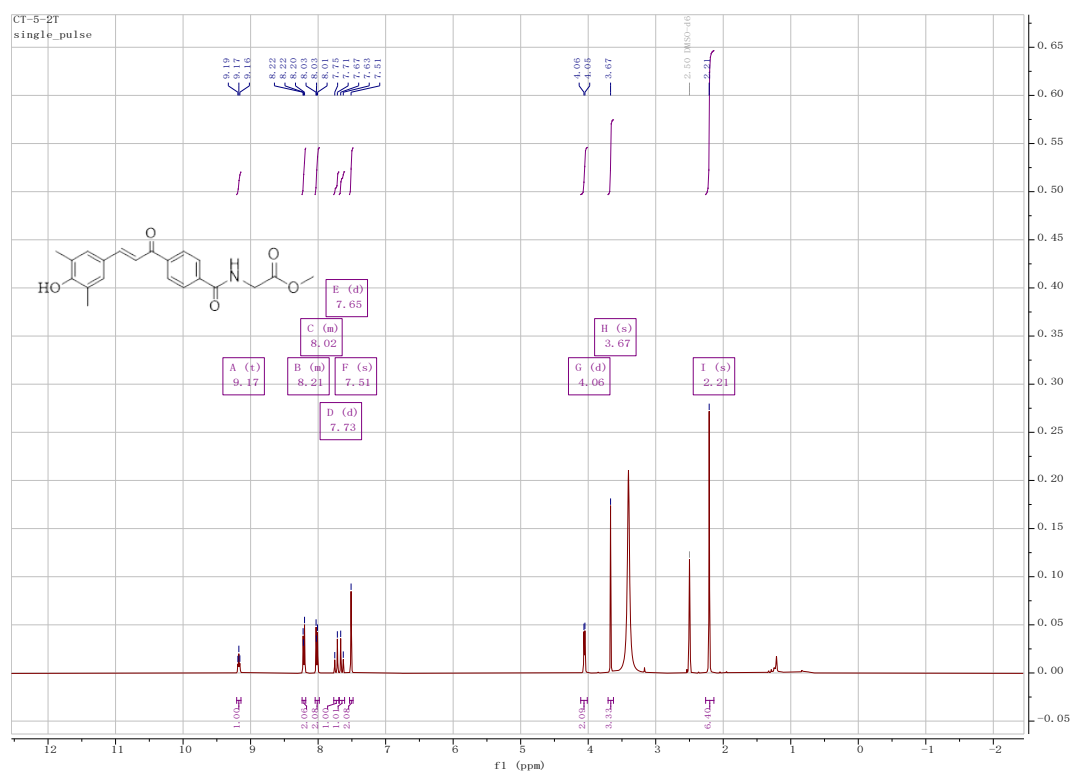

# <sup>13</sup>C NMR spectrum of **101** in DMSO

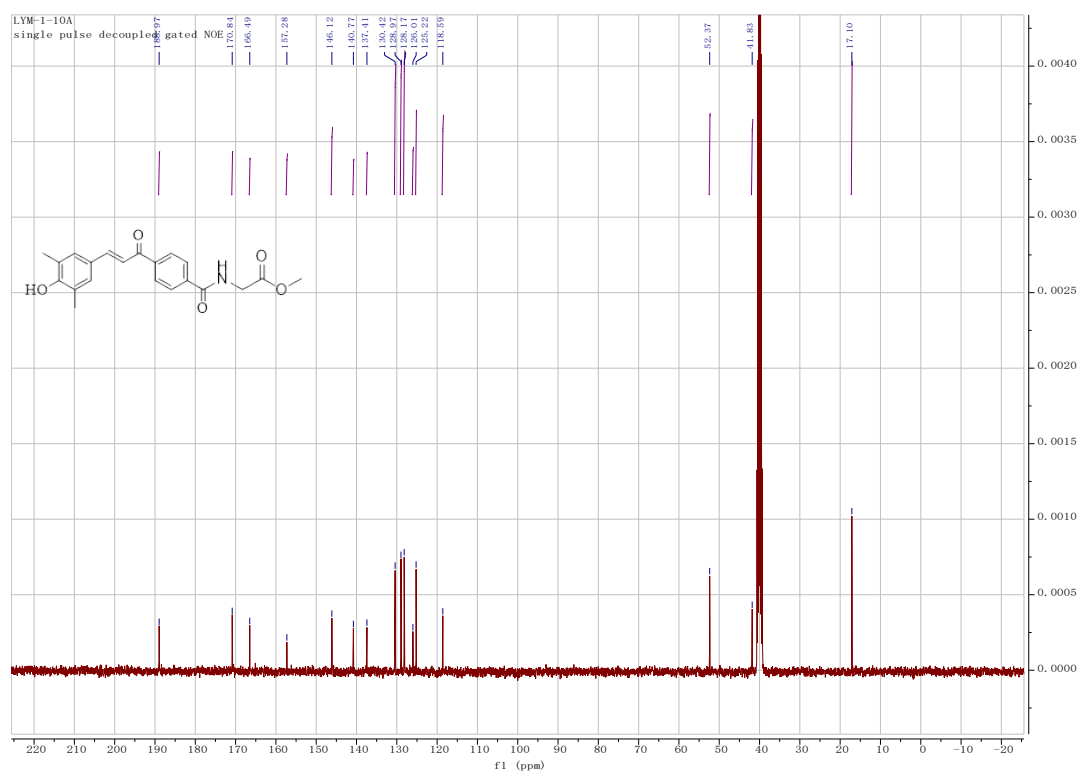

### <sup>1</sup>HNMR spectrum of **10m** in DMSO

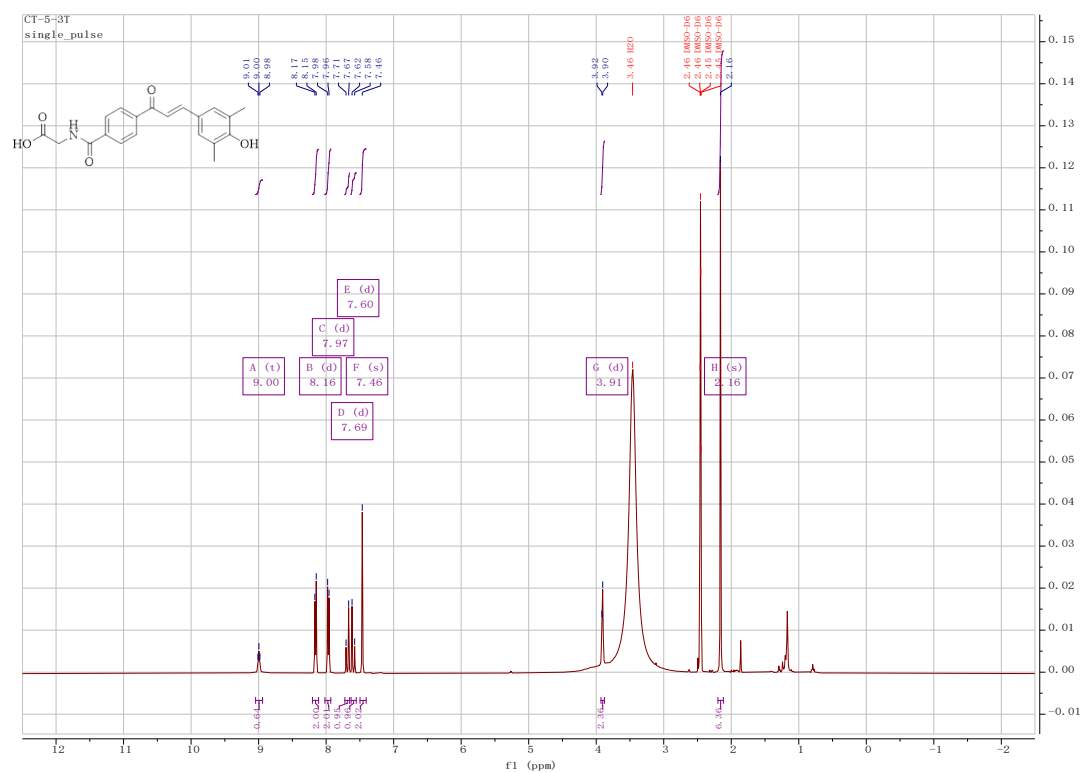

### <sup>13</sup>CNMR spectrum of **10m** in DMSO

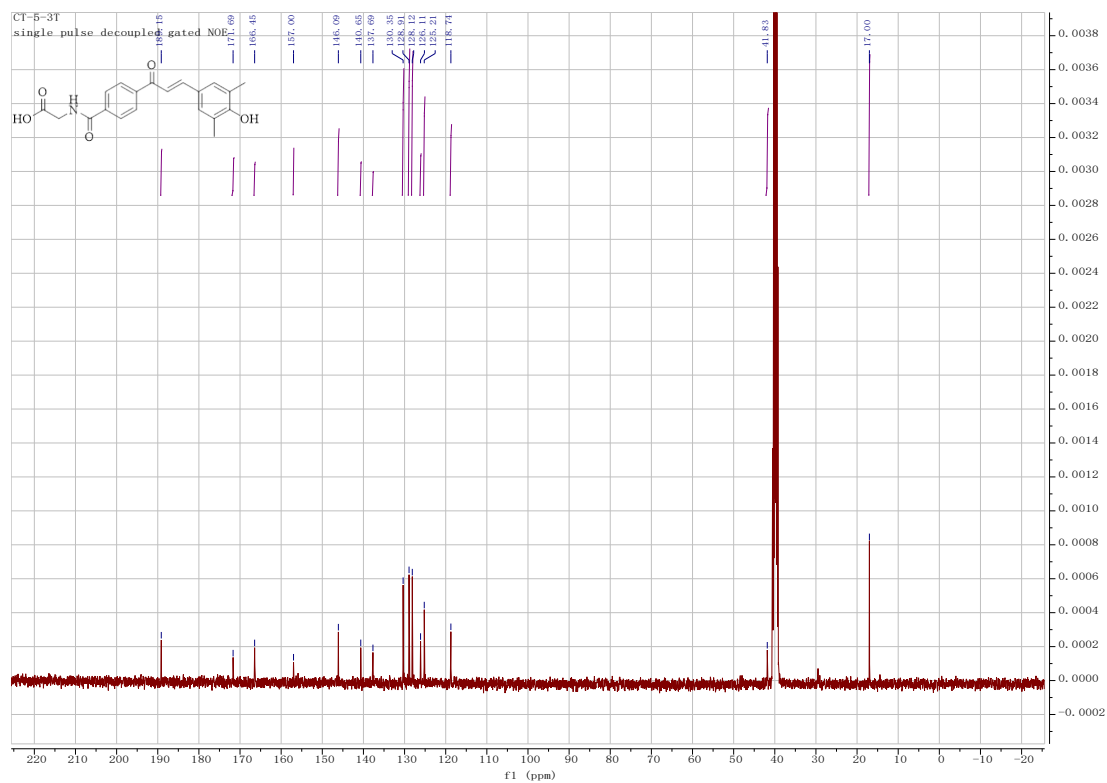

### <sup>1</sup>H NMR spectrum of **10n** in DMSO

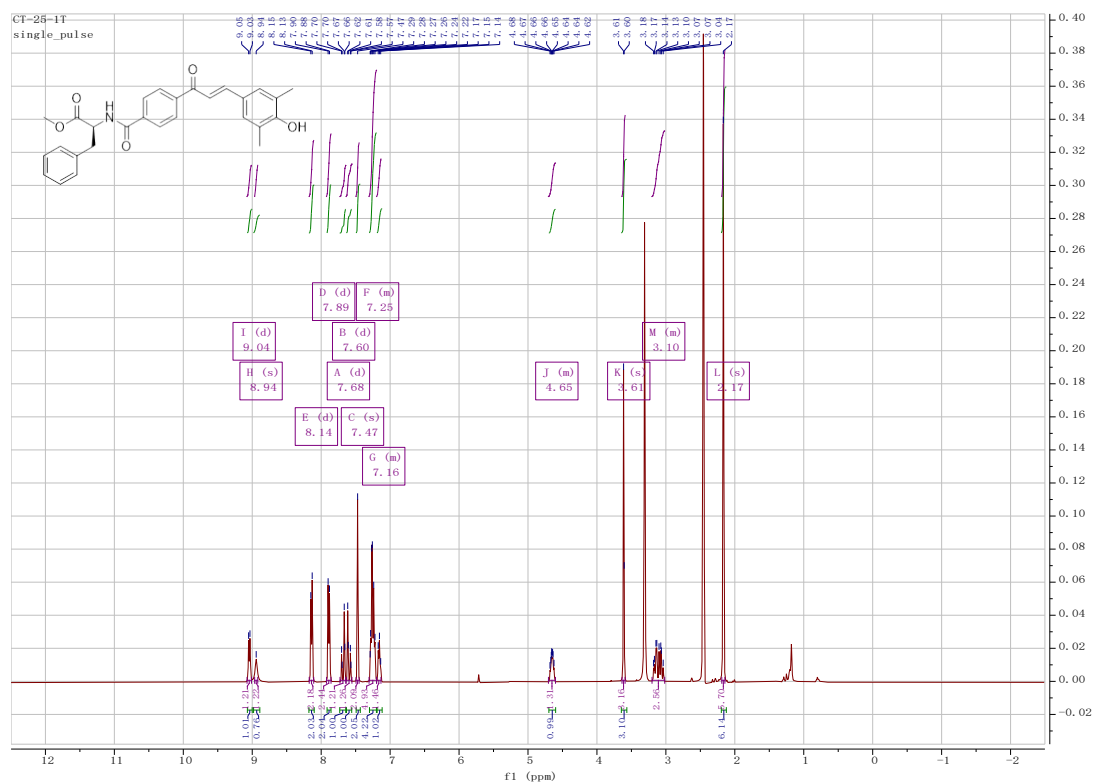

### <sup>13</sup>C NMR spectrum of **10n** in DMSO

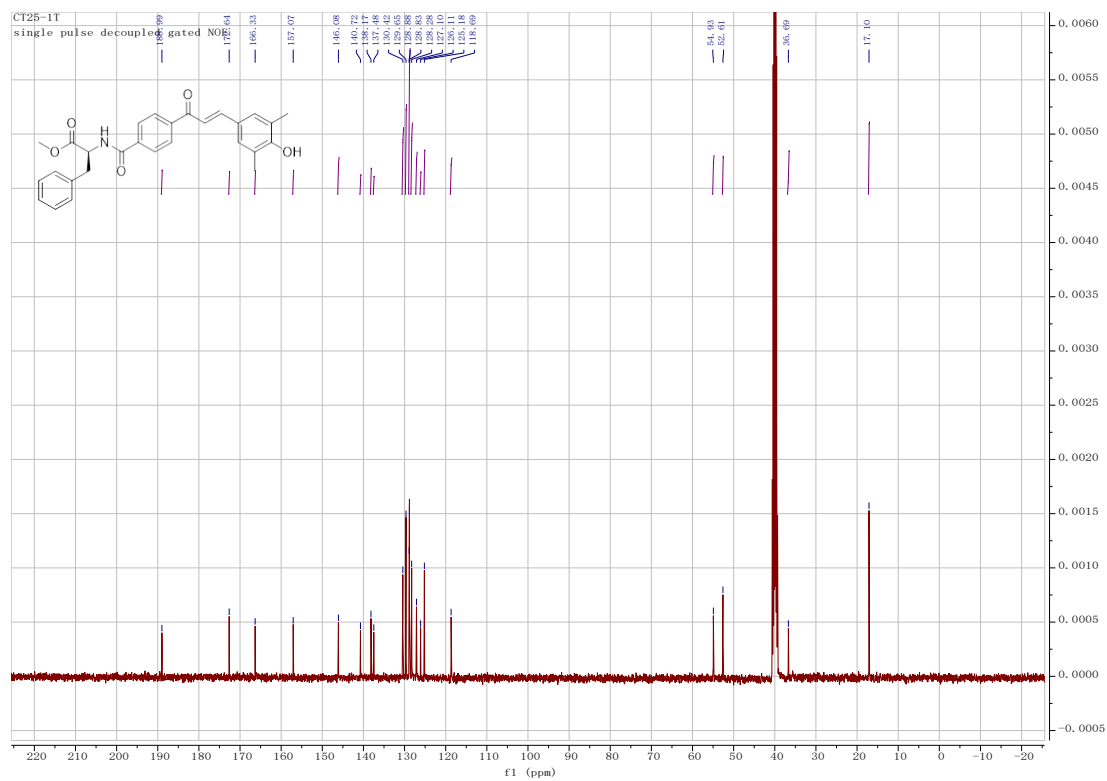

### <sup>1</sup>H NMR spectrum of **10o** in DMSO

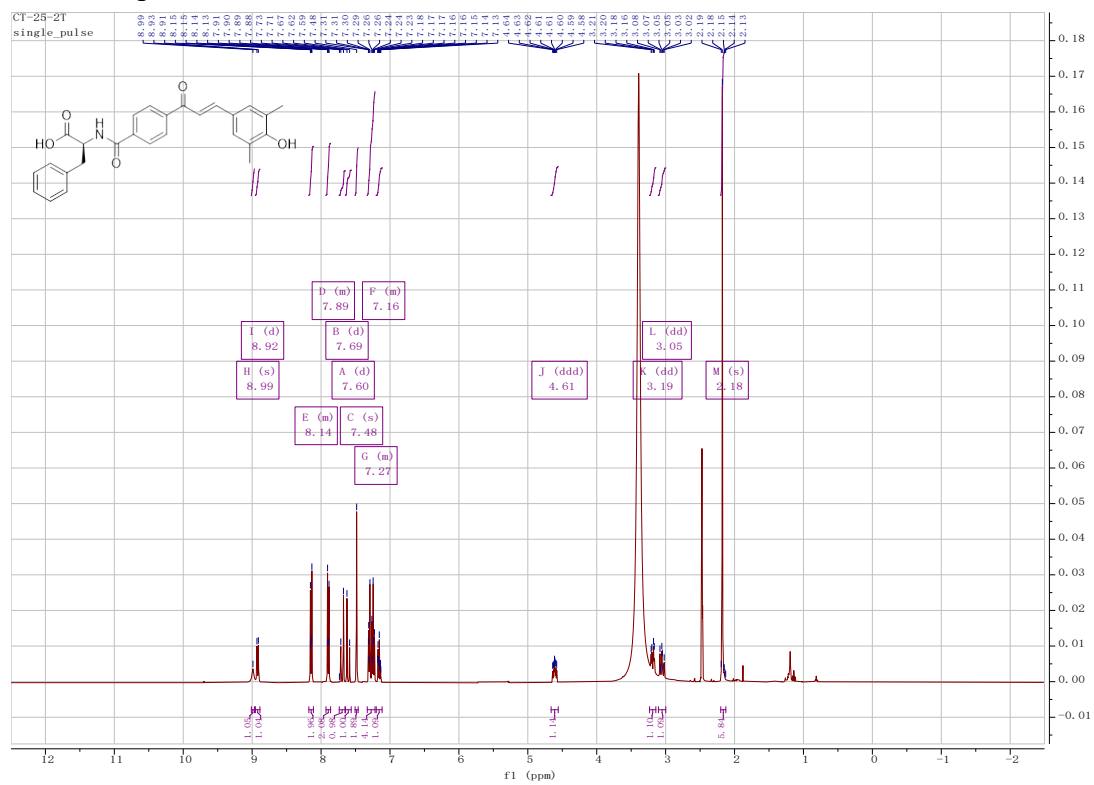

### <sup>13</sup>C NMR spectrum of **10o** in DMSO

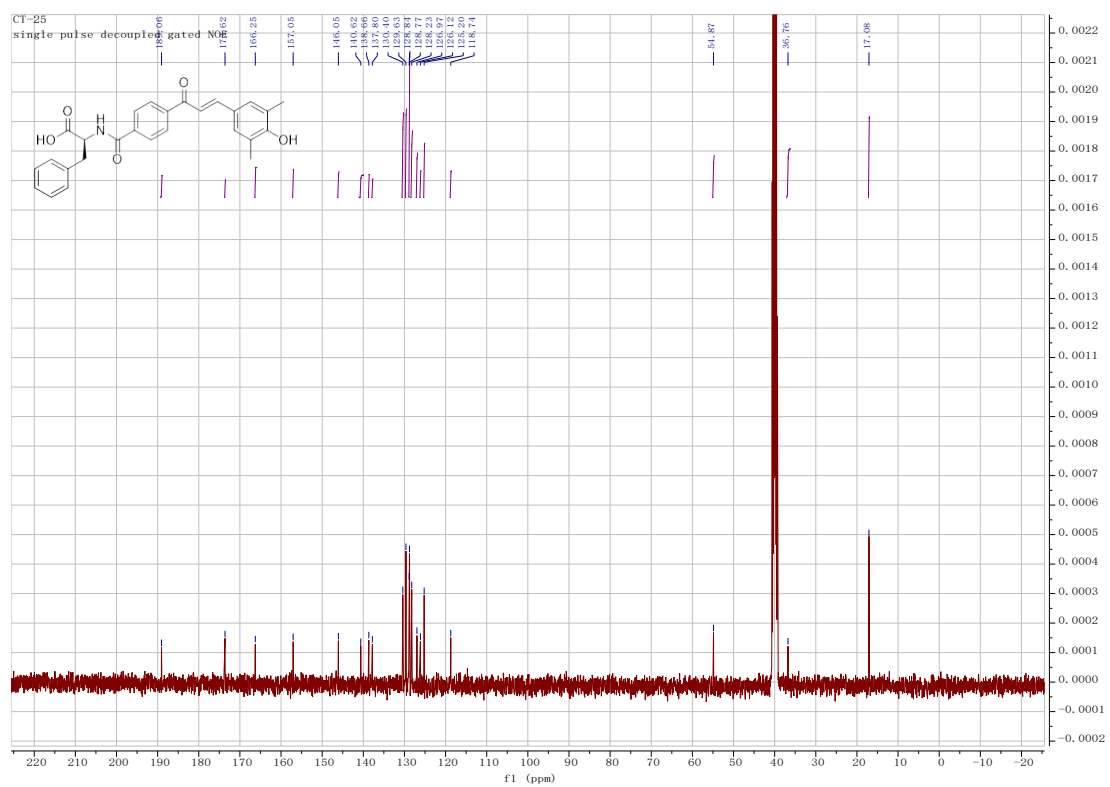

# <sup>1</sup>H NMR spectrum of **10p** in DMSO

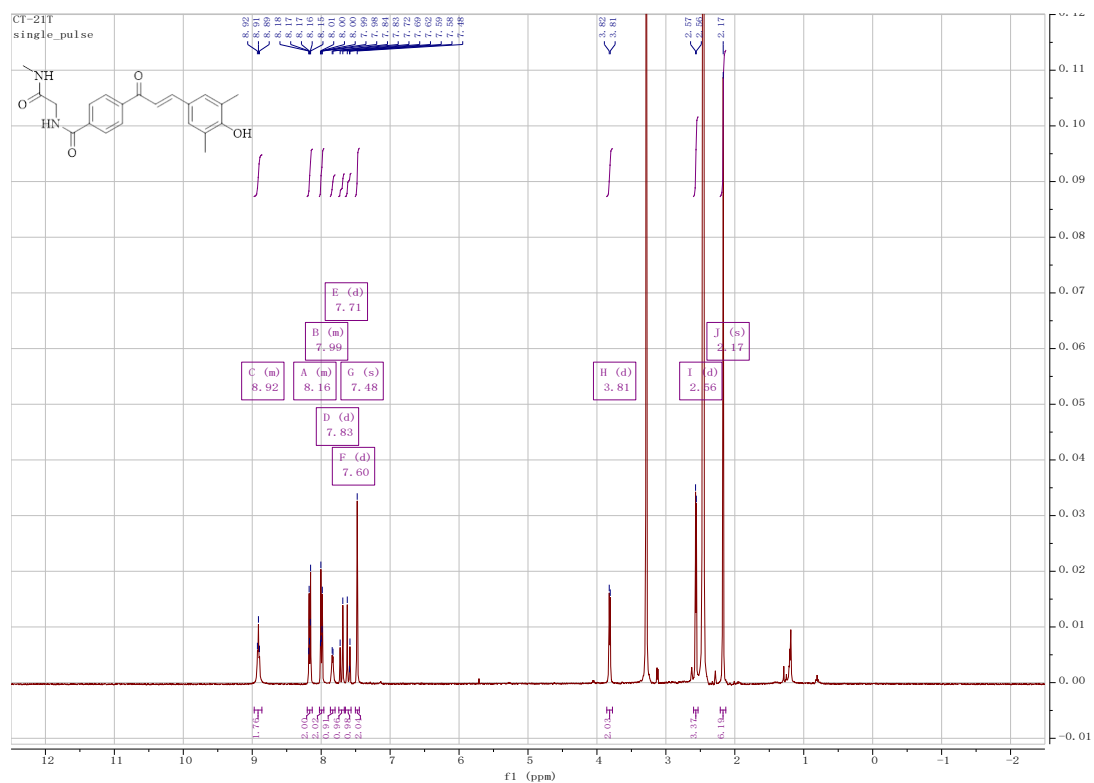

# <sup>13</sup>C NMR spectrum of **10p** in DMSO

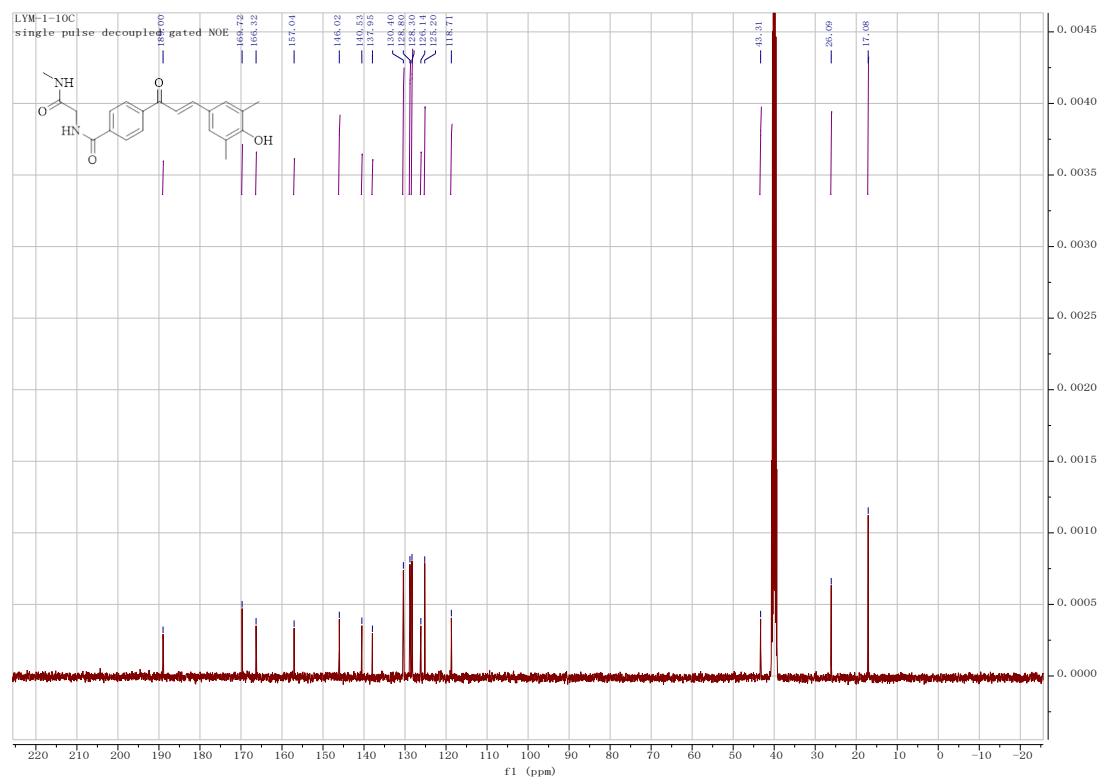



### <sup>1</sup>H NMR spectrum of **10q** in DMSO

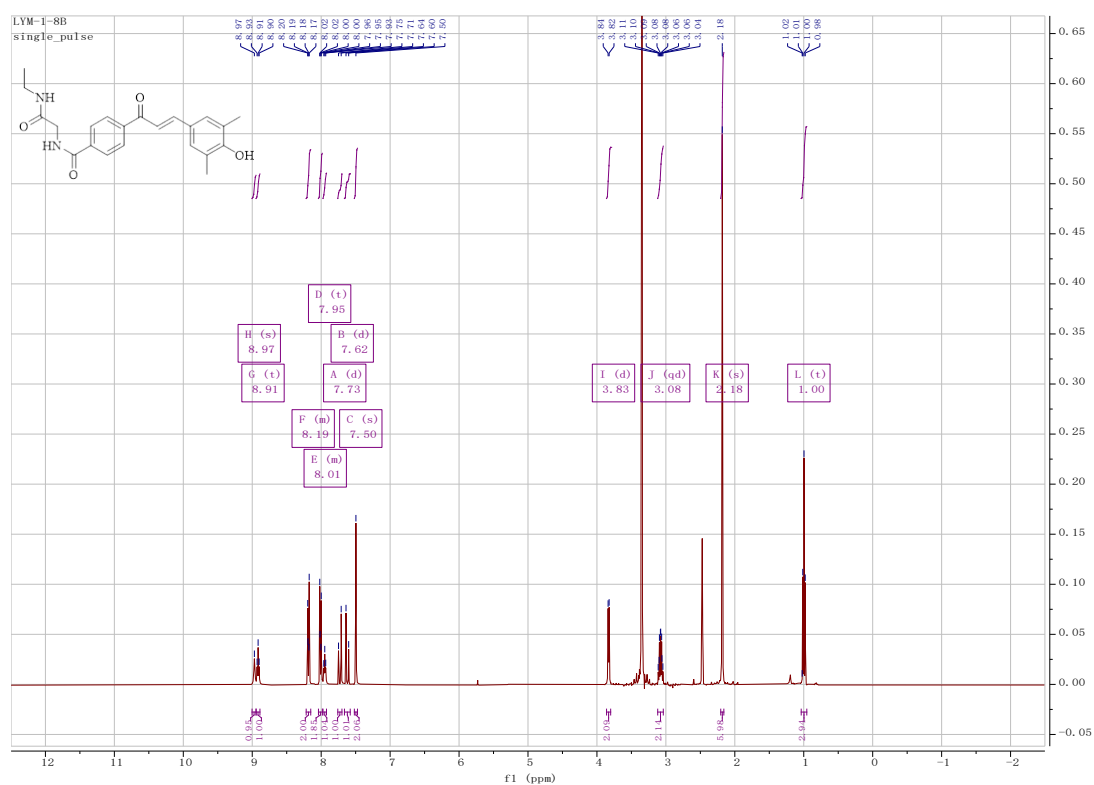

### <sup>13</sup>C NMR spectrum of **10q** in DMSO

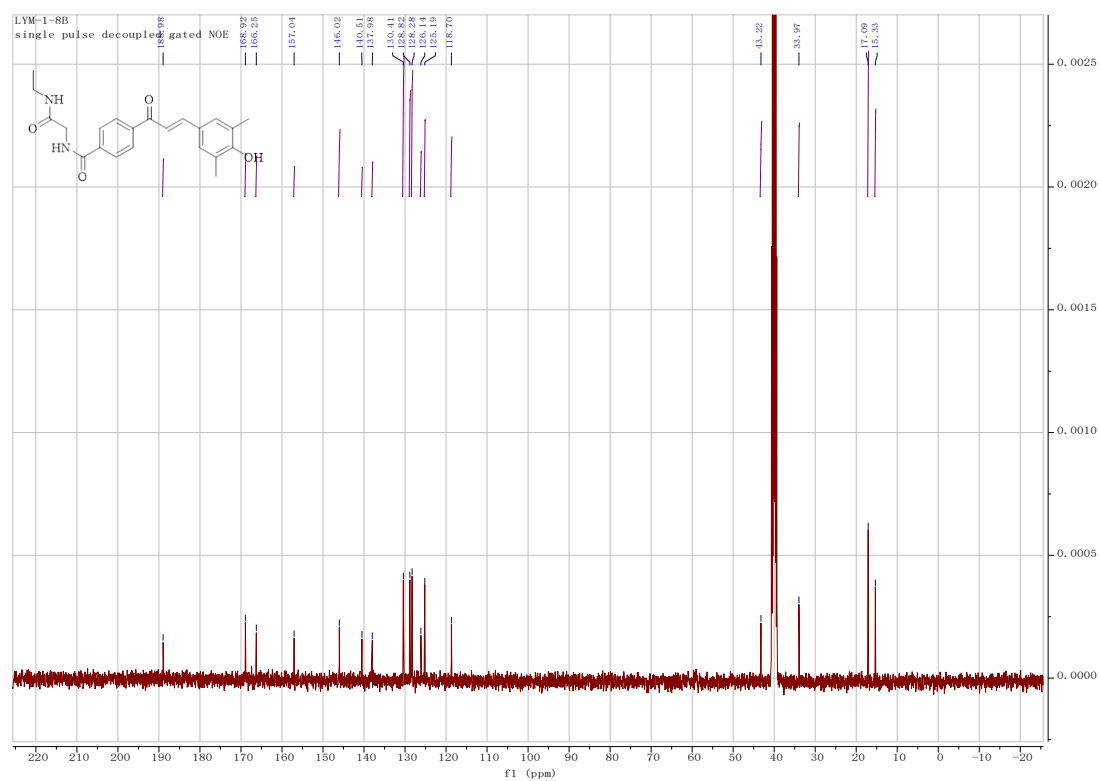

### <sup>1</sup>H NMR spectrum of **10r** in DMSO

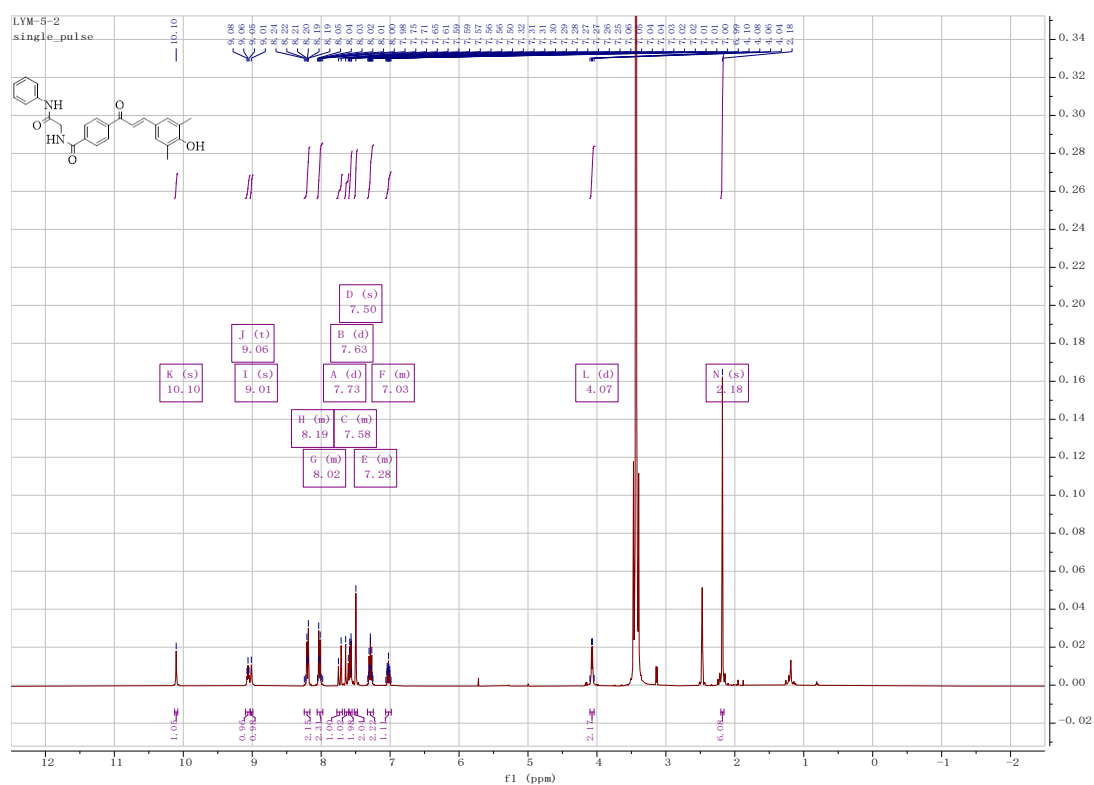

### <sup>13</sup>C NMR spectrum of **10r** in DMSO

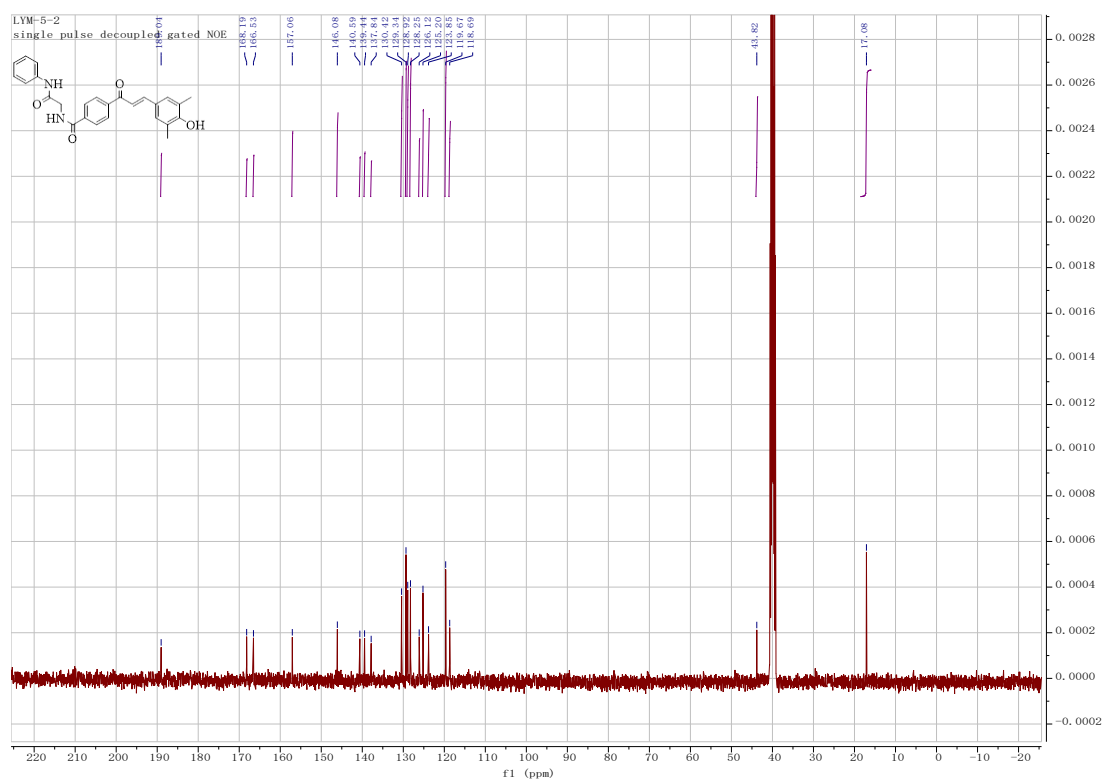

# <sup>1</sup>H NMR spectrum of 10s in DMSO

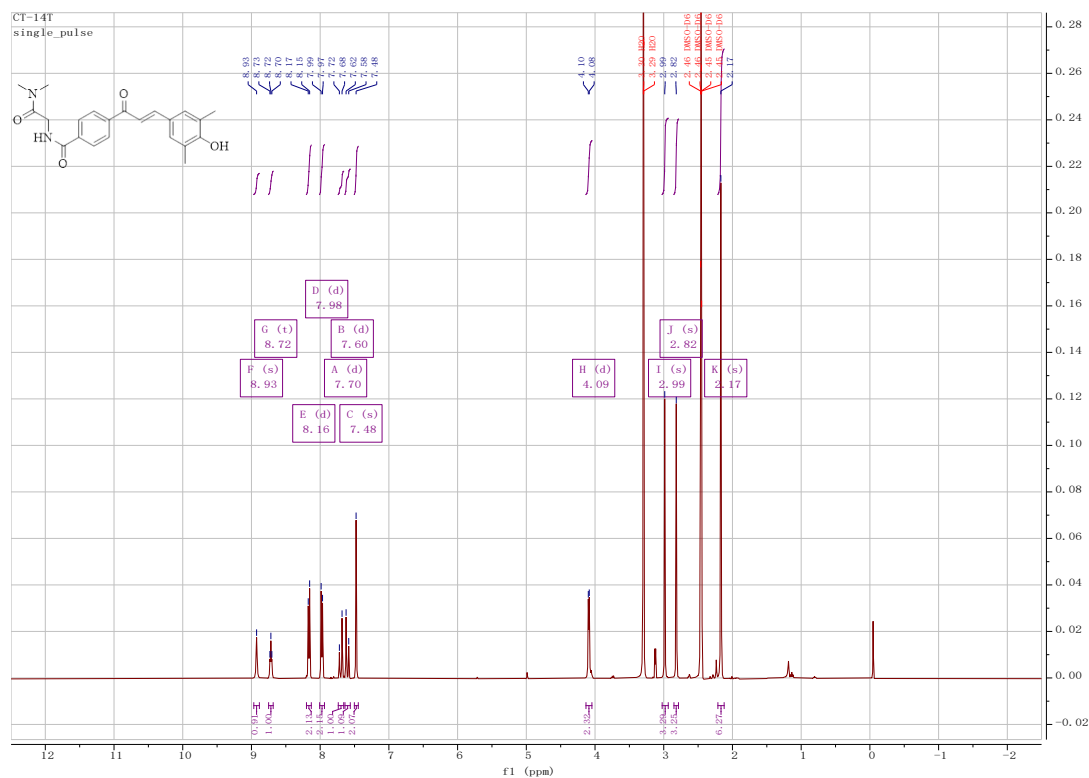

# <sup>13</sup>C NMR spectrum of 10s in DMSO

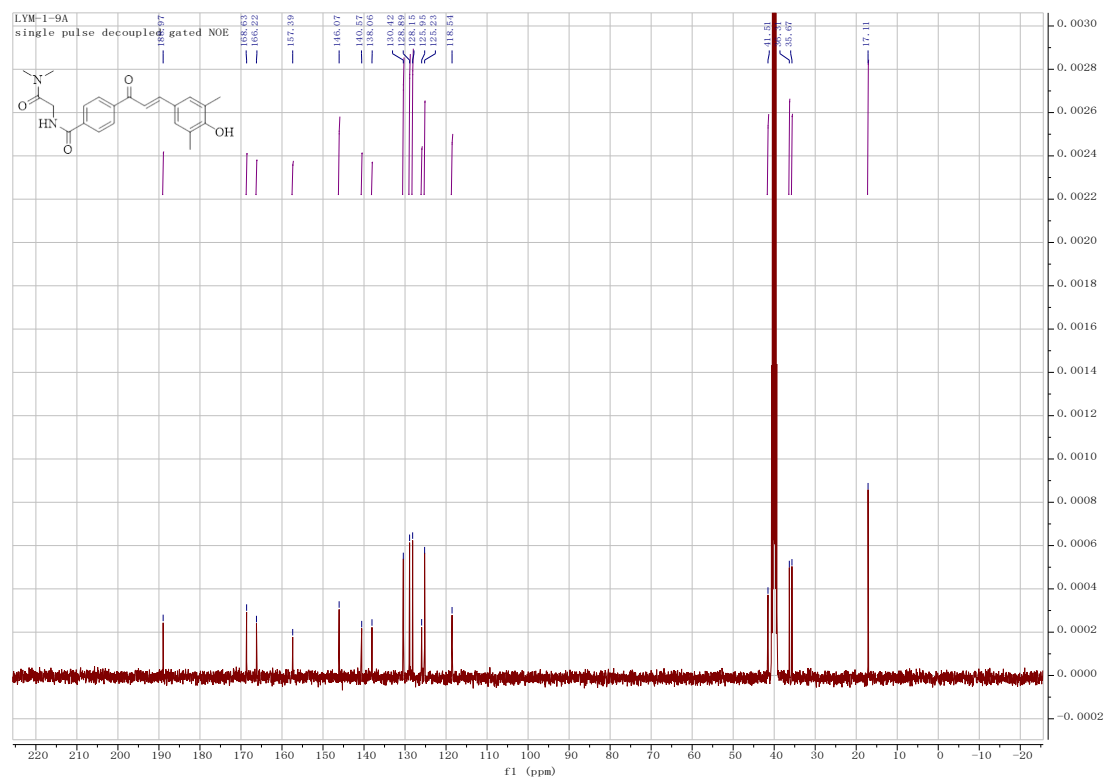

<sup>1</sup>HNMR spectrum of **10t** in CDCl<sub>3</sub>

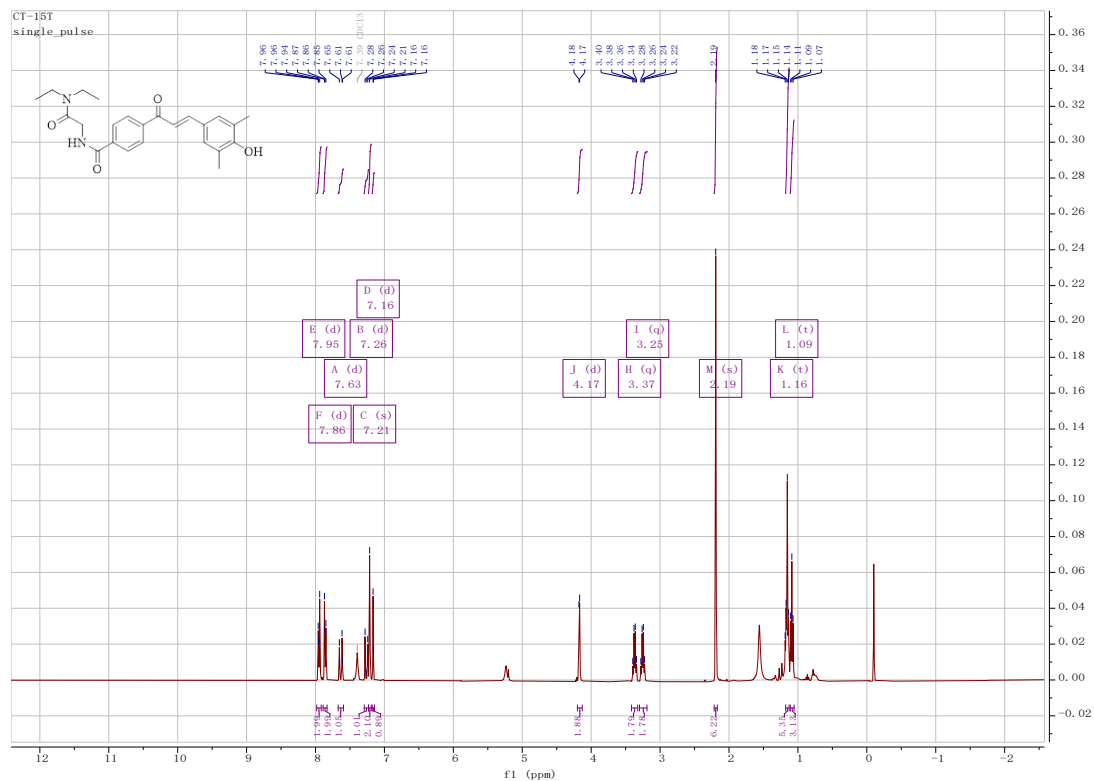

<sup>13</sup>CNMR spectrum of **10t** in DMSO

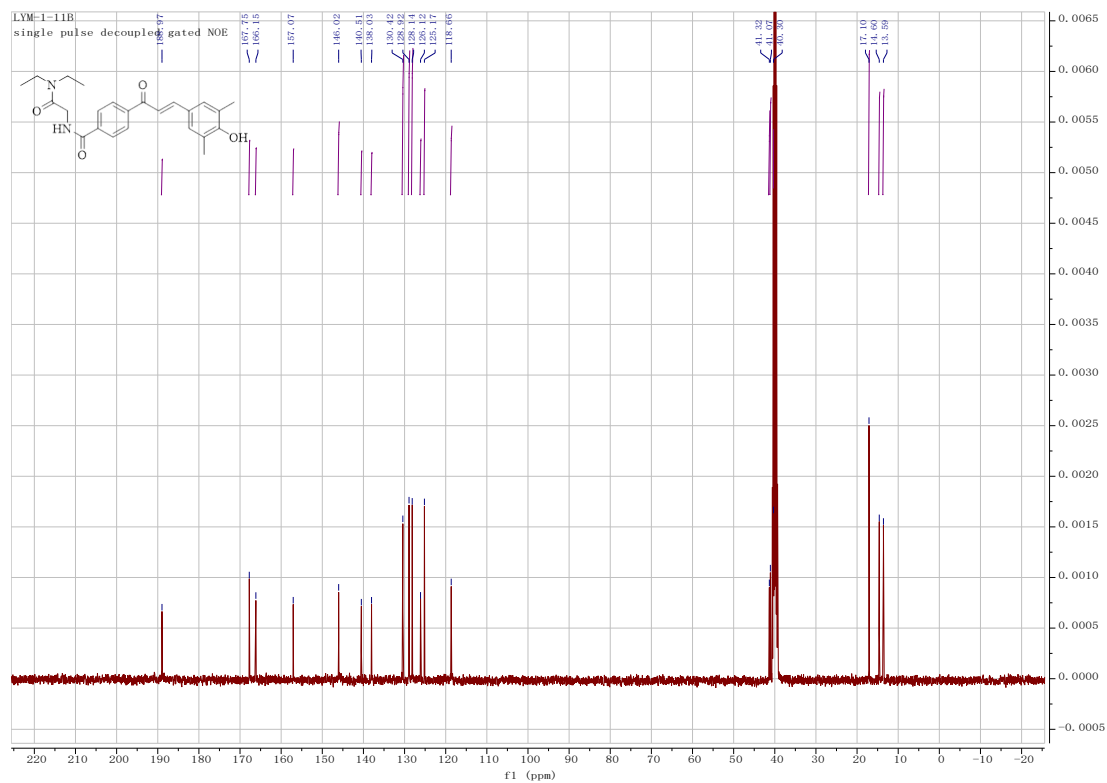

# <sup>1</sup>H NMR spectrum of **10u** in CD<sub>3</sub>OD

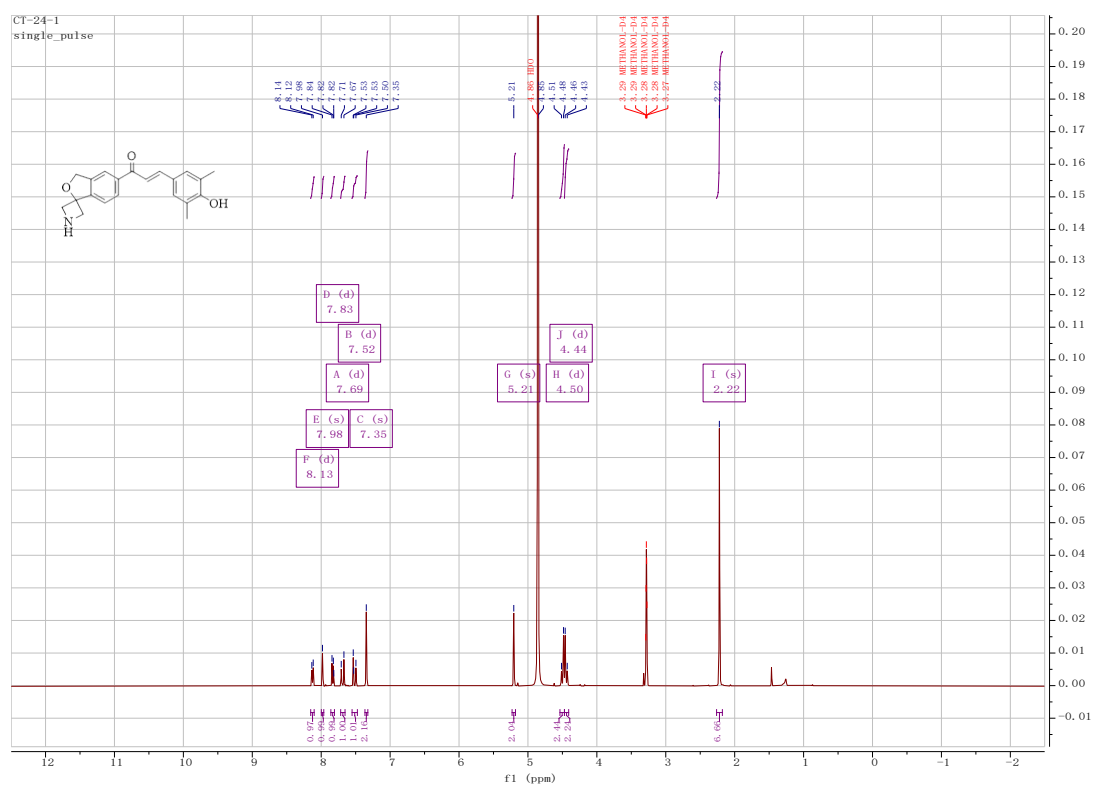

# <sup>13</sup>C NMR spectrum of **10u** in DMSO

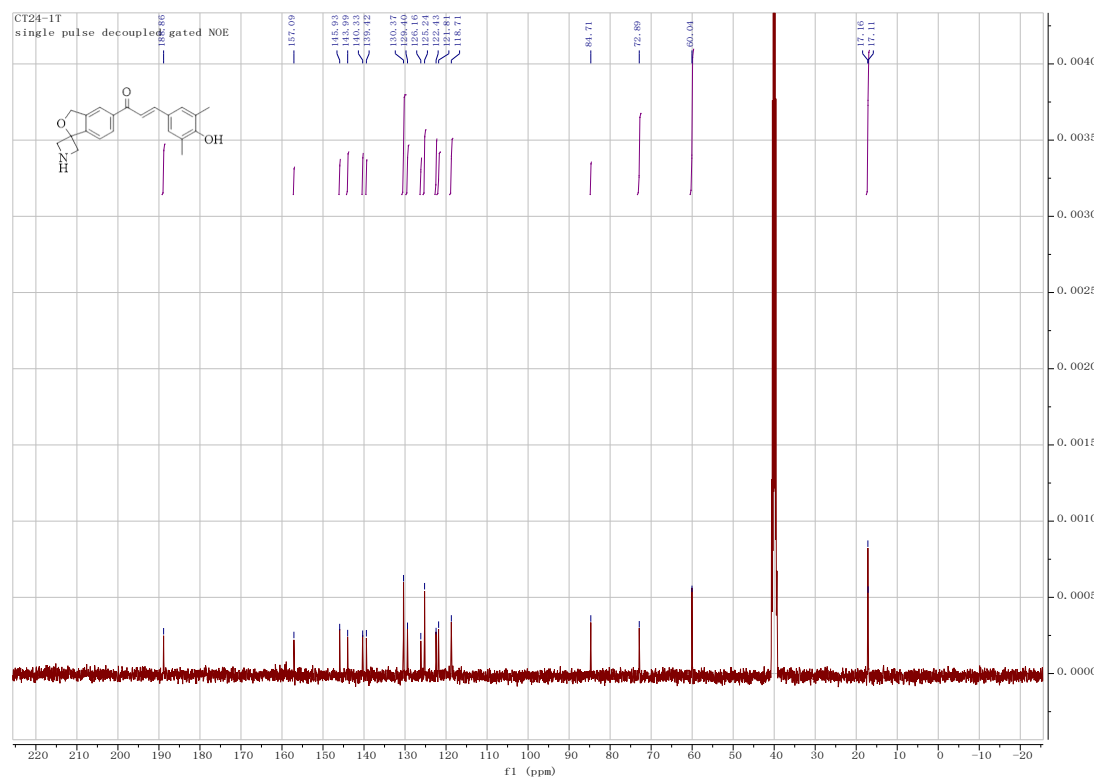

<sup>1</sup>H NMR spectrum of **10v** in CD<sub>3</sub>OD

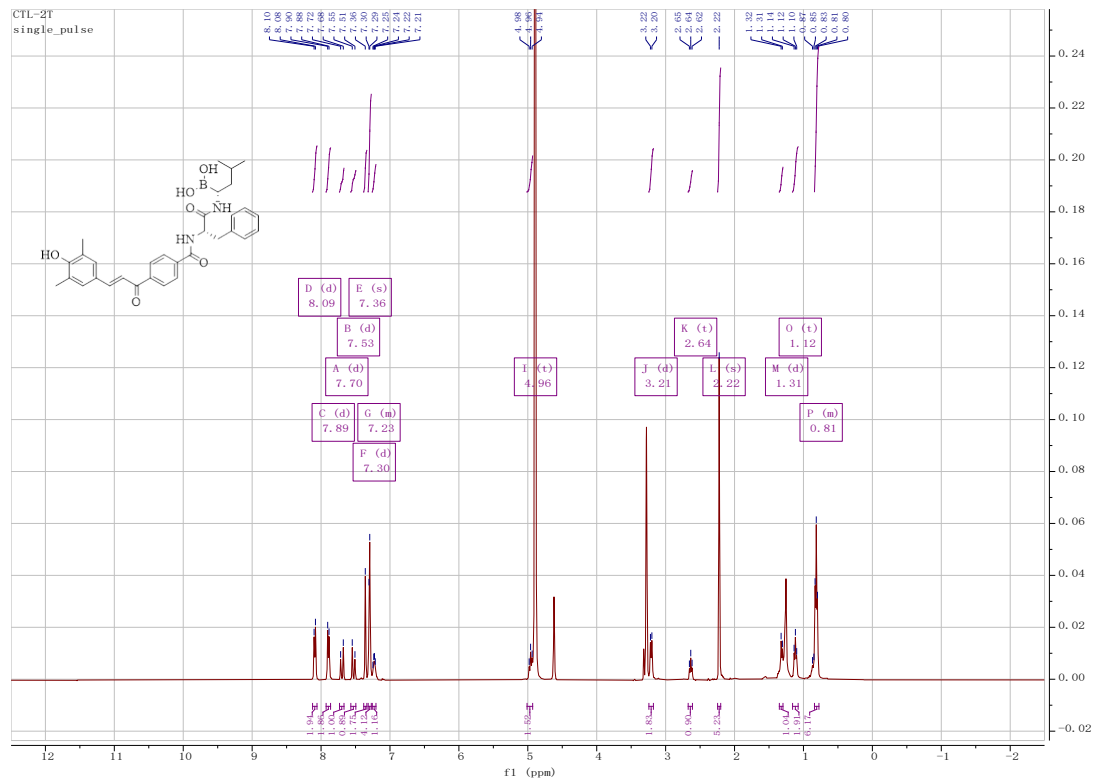

<sup>13</sup>C NMR spectrum of **10v** in CD<sub>3</sub>OD

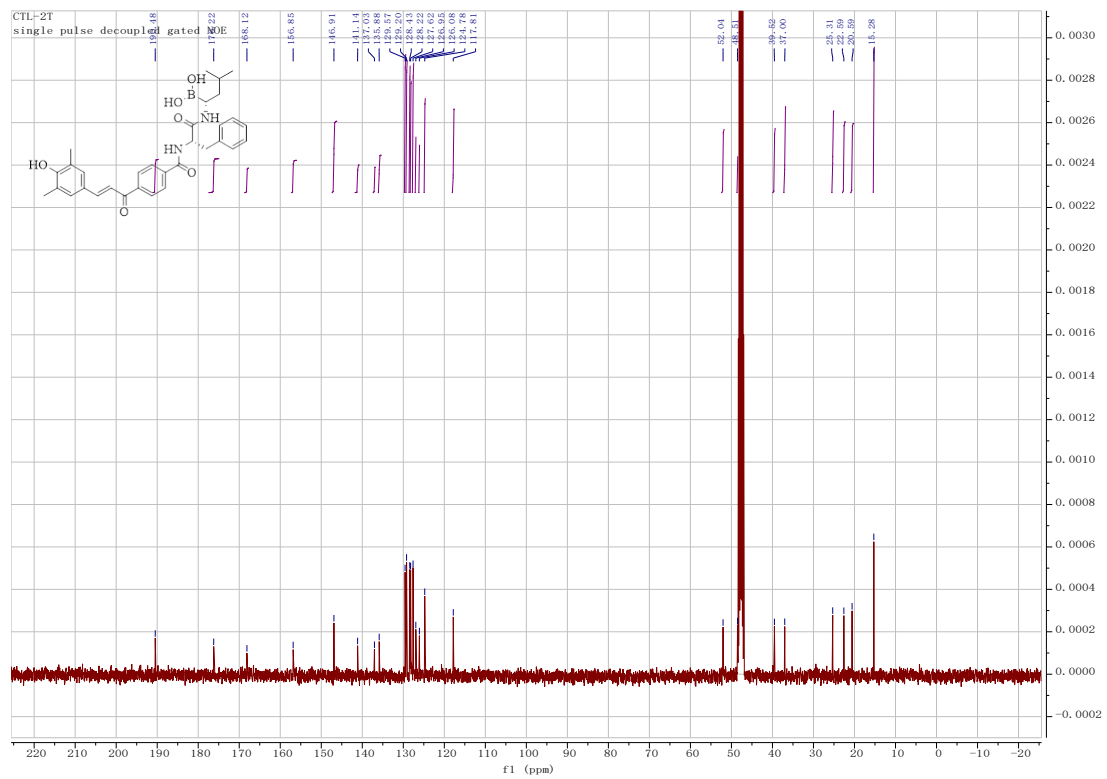

## 2. Copies of the HRMS

### Mass spectrometry of 5

YY-15 #29-38 RT: 0.13-0.17 AV: 10 SB: 12 0.09-0.14 NL: 1.62E7  
T: FTMS + p.ESI Full ms [105.0000-1500.0000]

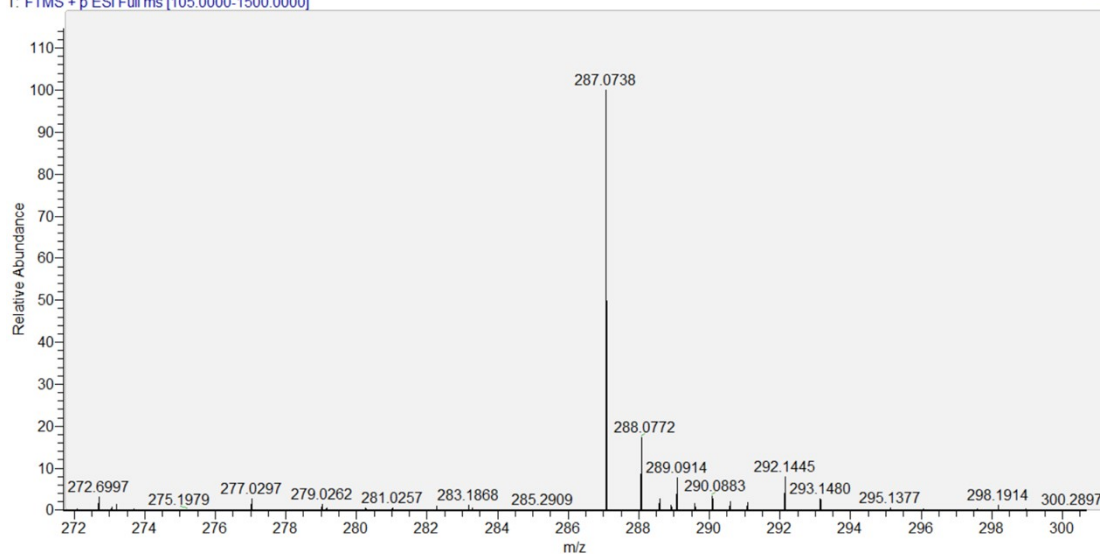

### Mass spectrometry of 10b

ZXX34 #27-36 RT: 0.12-0.16 AV: 10 NL: 5.61E8  
T: FTMS + p.ESI Full ms [105.0000-1500.0000]

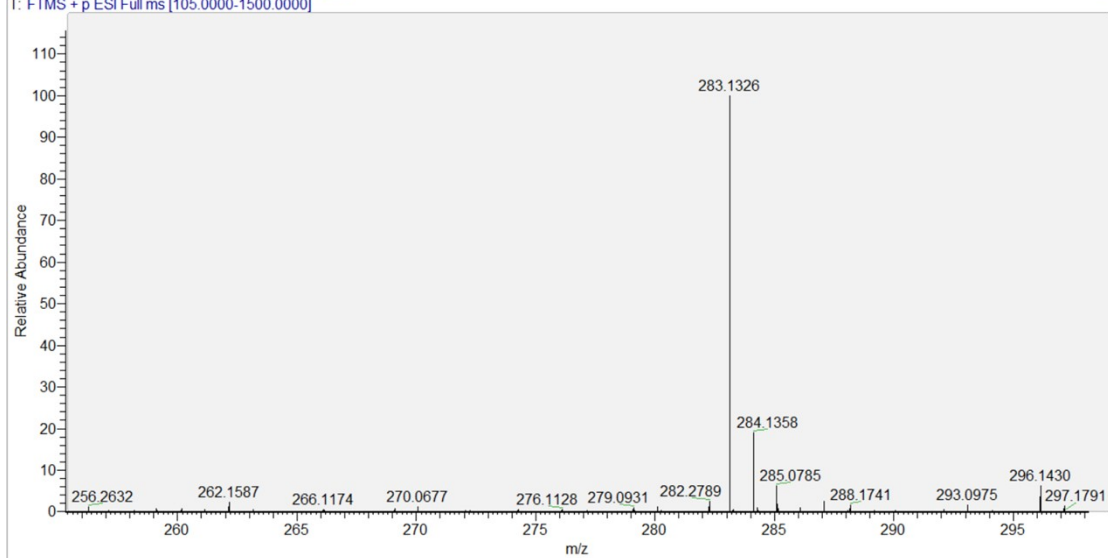

### Mass spectrometry of 10c

ZXX36 #18-28 RT: 0.08-0.12 AV: 11 NL: 5.80E8  
T: FTMS + p ESI Full ms [105.0000-1500.0000]

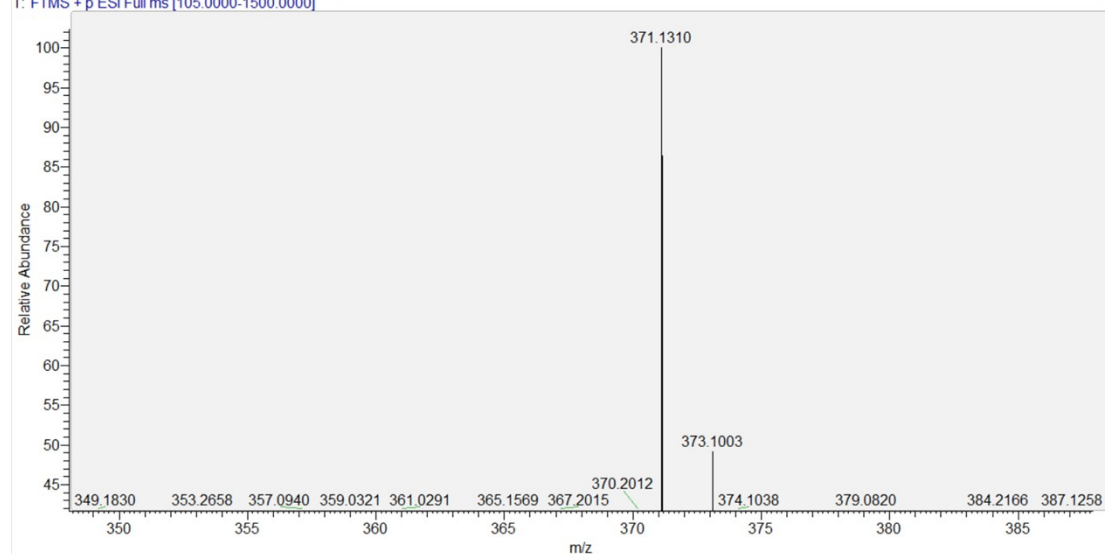

### Mass spectrometry of 10d

ZXX32 #20-30 RT: 0.09-0.13 AV: 11 NL: 1.75E9  
T: FTMS + p ESI Full ms [105.0000-1500.0000]

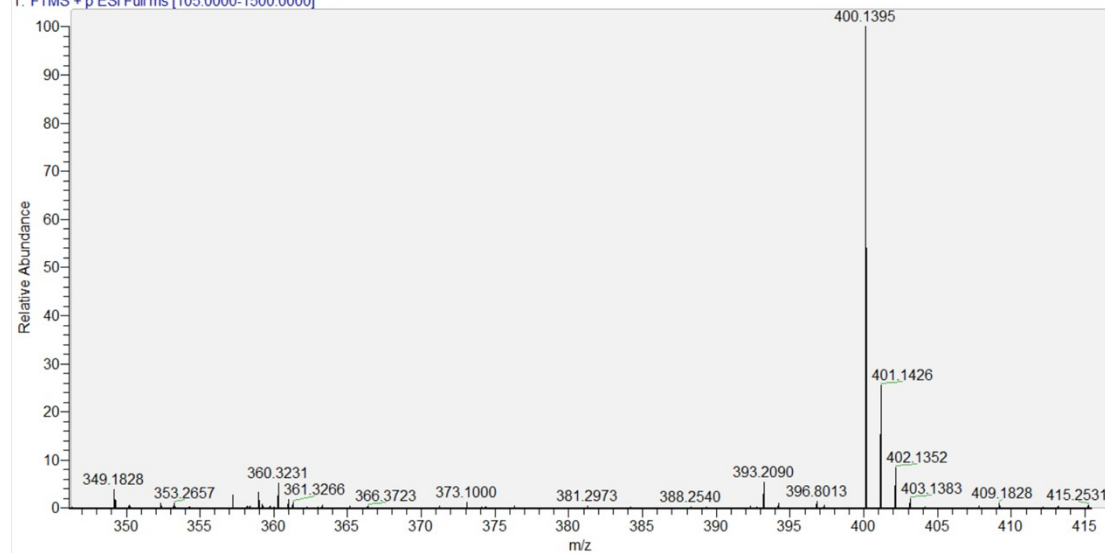



## Mass spectrometry of 10f

YYY-19#28-43 RT: 0.12-0.19 AV: 16 NL: 1.76E9  
T: FTMS + p ESI Full ms [105.0000-1500.0000]

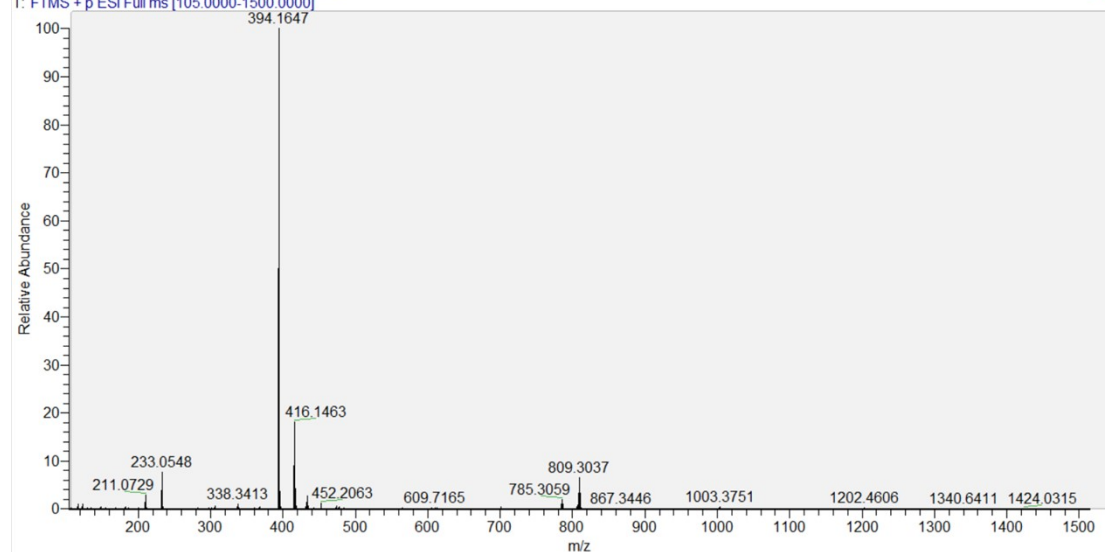

## Mass spectrometry of 10h

ZXX35#19-28 RT: 0.08-0.12 AV: 10 NL: 2.49E9  
T: FTMS + p ESI Full ms [105.0000-1500.0000]

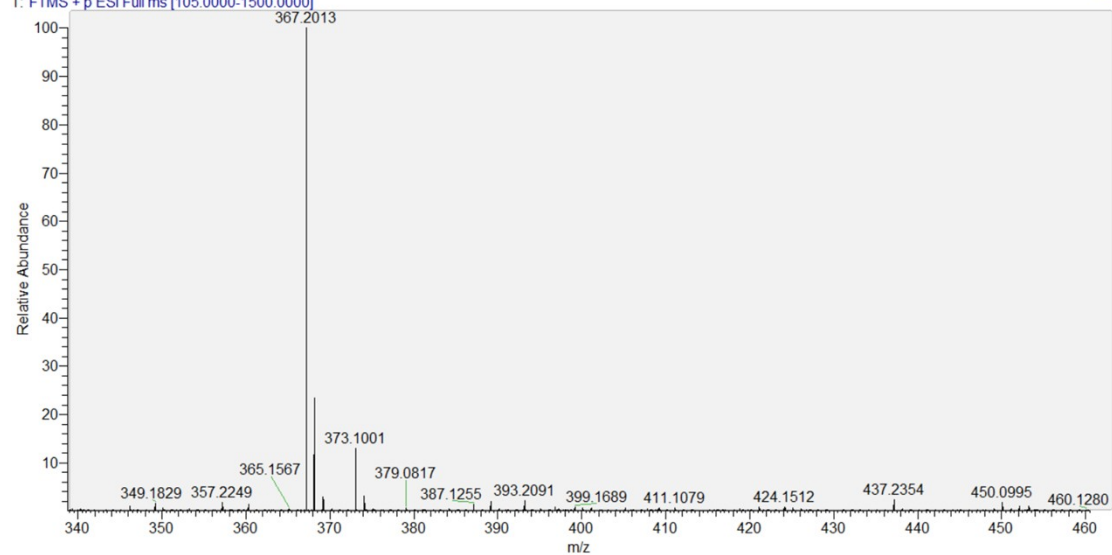

### Mass spectrometry of 10i

ZXX33 #21-35 RT: 0.09-0.15 AV: 15 NL: 2.75E7  
T: FTMS → p ESI Full ms [105.0000-1500.0000]

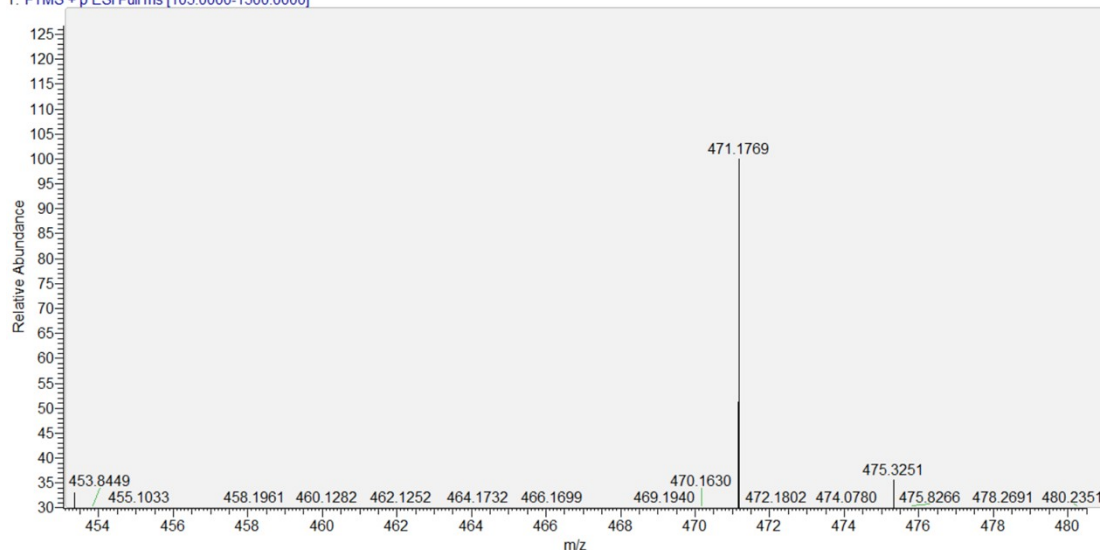

### Mass spectrometry of 10j

YYY-16 #17-29 RT: 0.07-0.13 AV: 13 NL: 3.74E8  
T: FTMS → p ESI Full ms [105.0000-1500.0000]

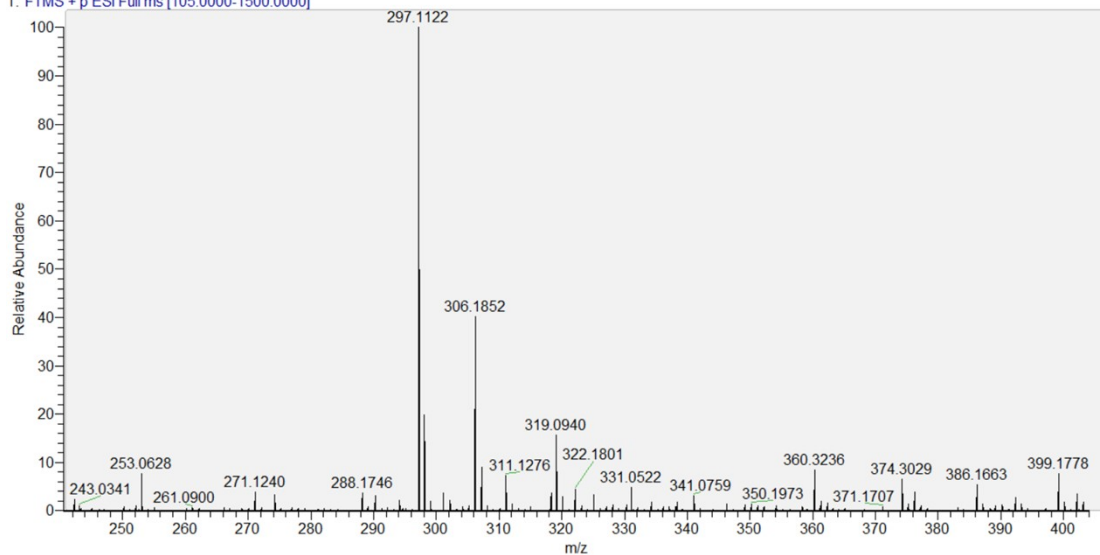

## Mass spectrometry of 10k

ZXX40 #20-27 RT: 0.09-0.12 AV: 8 NL: 2.29E9  
T: FTMS + p ESI Full ms [105.0000-1500.0000]

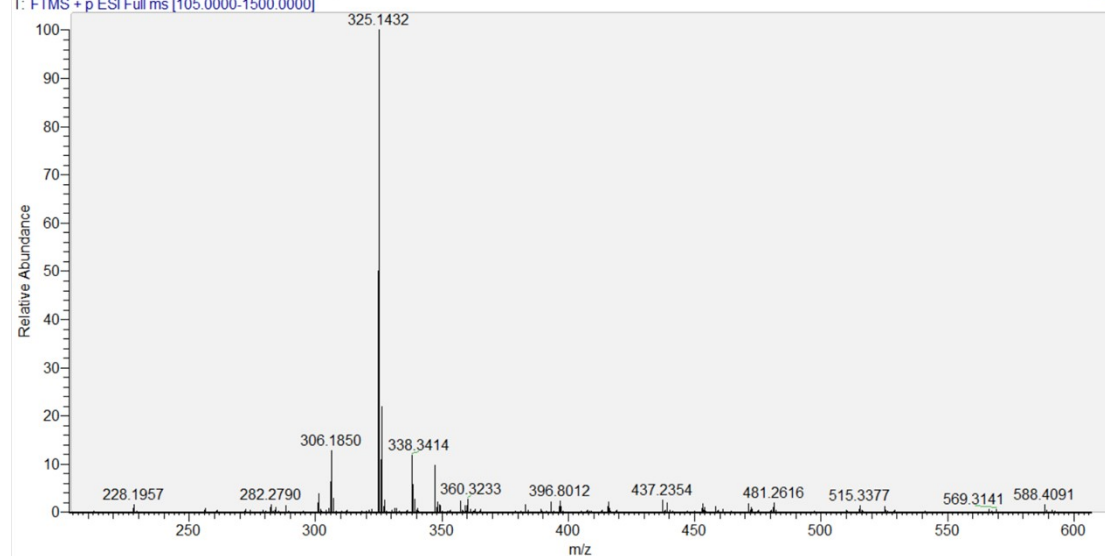

## Mass spectrometry of 10l

YYY:17 #17-31 RT: 0.07-0.14 AV: 15 NL: 2.36E9  
T: FTMS + p ESI Full ms [105.0000-1500.0000]

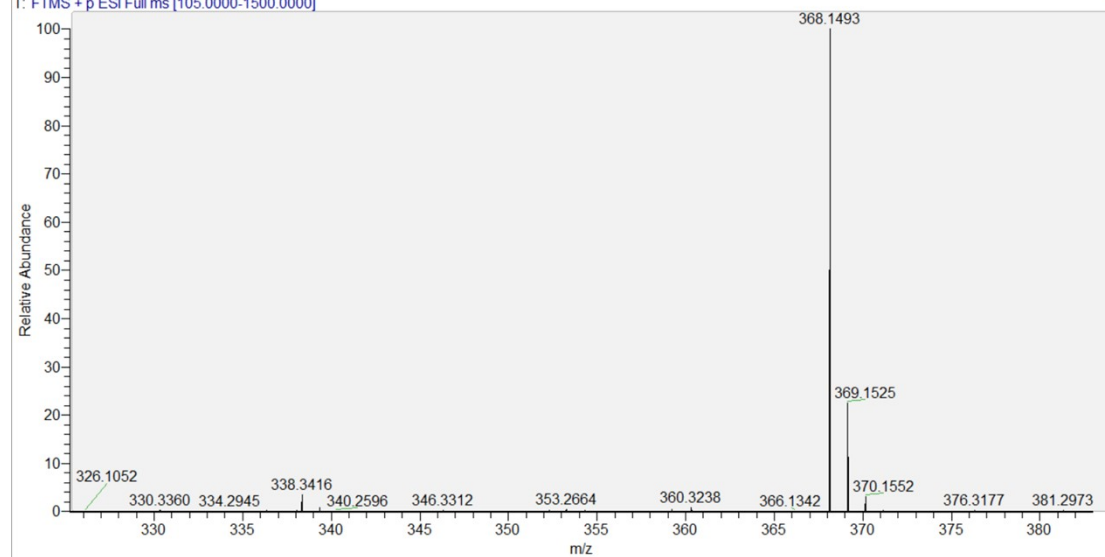

## Mass spectrometry of 10m

YYY-18 #18-31 RT: 0.08-0.14 AV: 14 NL: 9.12E8  
T: FTMS + p ESI Full ms [105.0000-1500.0000]

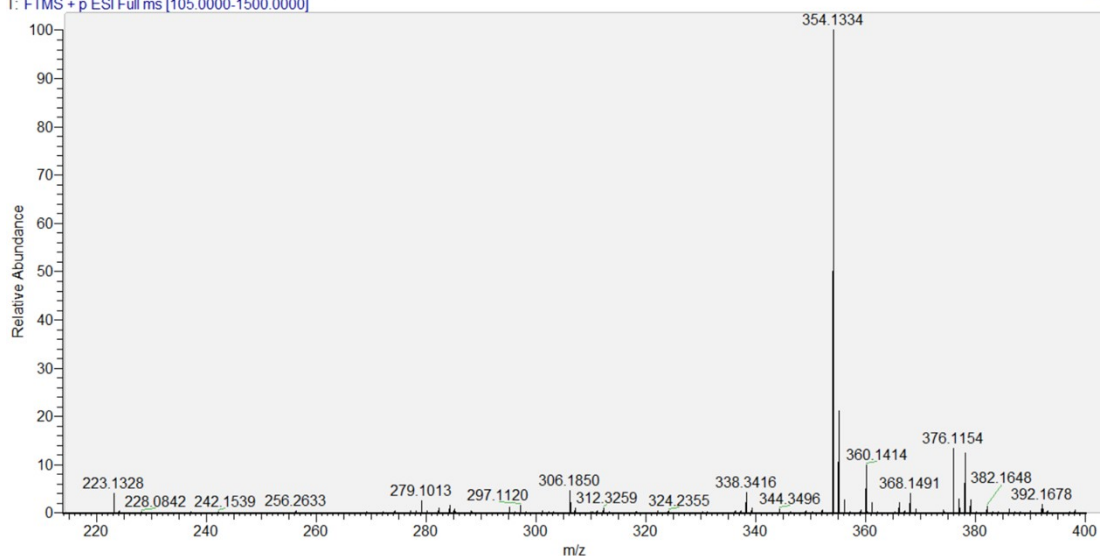

## Mass spectrometry of 10n

ZXX12 #19-28 RT: 0.08-0.12 AV: 10 NL: 1.37E9  
T: FTMS + p ESI Full ms [105.0000-1500.0000]

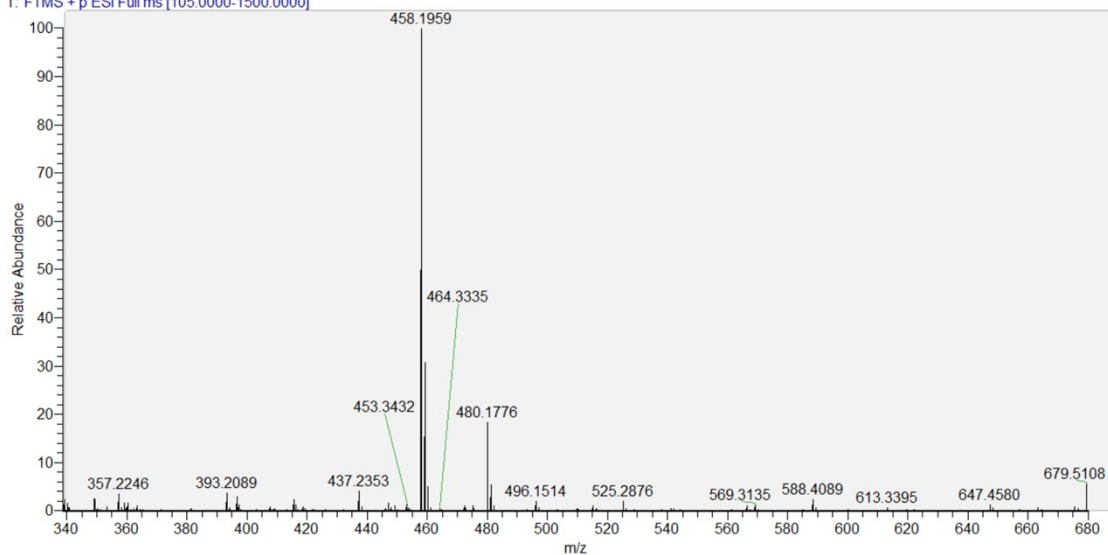

## Mass spectrometry of 10o

YYY-25 #15-29 RT: 0.07-0.14 AV: 15 NL: 2.56E8  
T: FTMS + p ESI Full ms [105.0000-1500.0000]

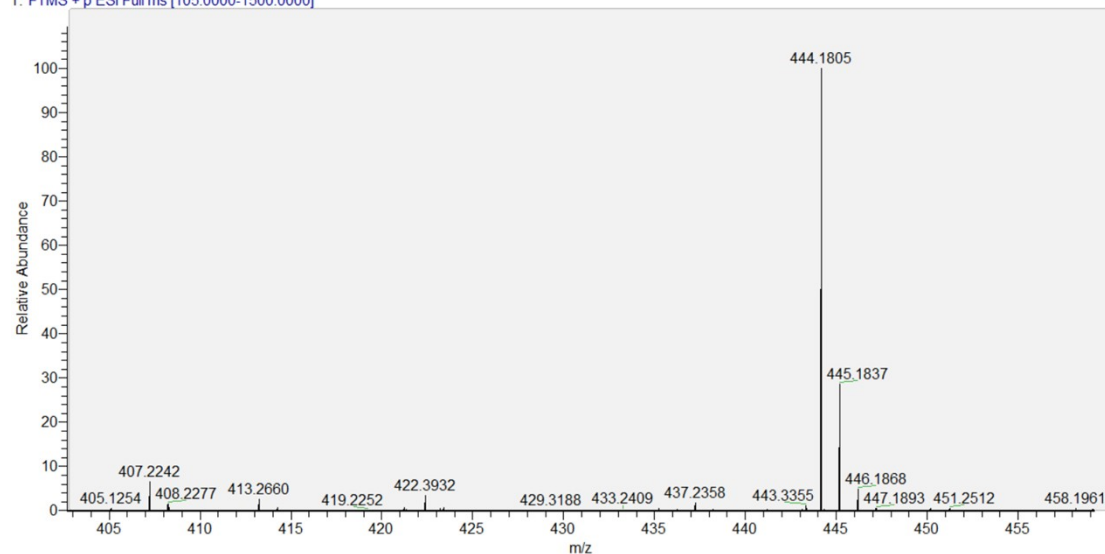

## Mass spectrometry of 10p

YYY-23 #16-28 RT: 0.07-0.12 AV: 13 NL: 1.21E9  
T: FTMS + p ESI Full ms [105.0000-1500.0000]

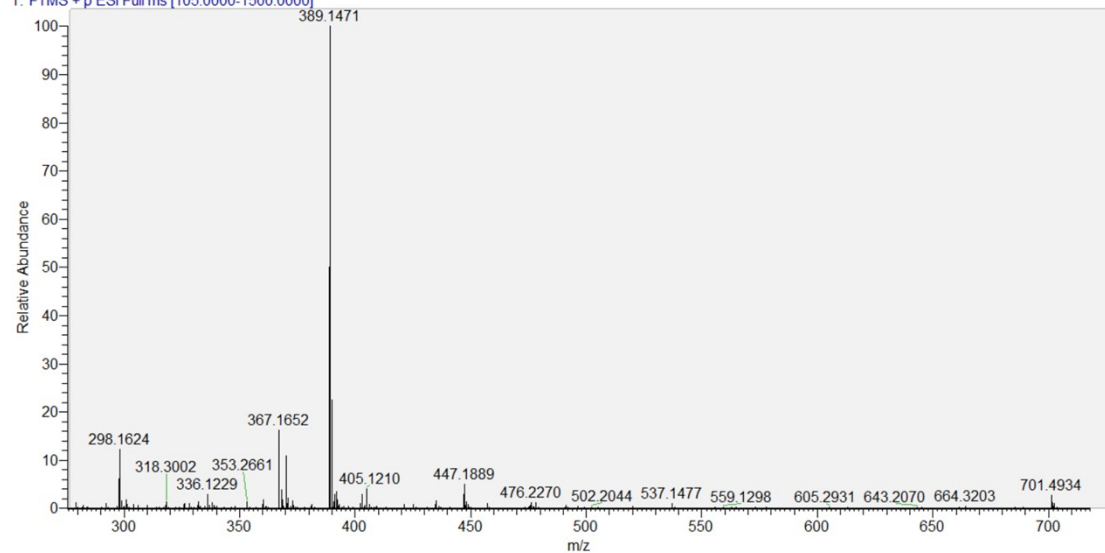

### Mass spectrometry of 10q

YYY-22 #17-28 RT: 0.07-0.12 AV: 12 NL: 1.21E9  
T: FTMS + p ESI Full ms [105.0000-1500.0000]

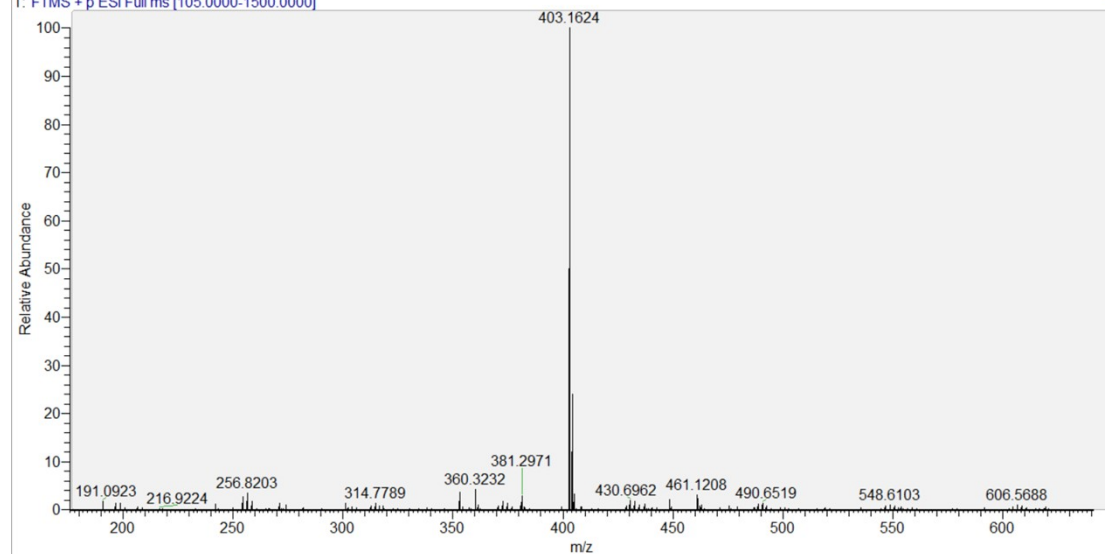

### Mass spectrometry of 10r

YYY-24 #17-29 RT: 0.07-0.13 AV: 13 NL: 1.29E8  
T: FTMS + p ESI Full ms [105.0000-1500.0000]

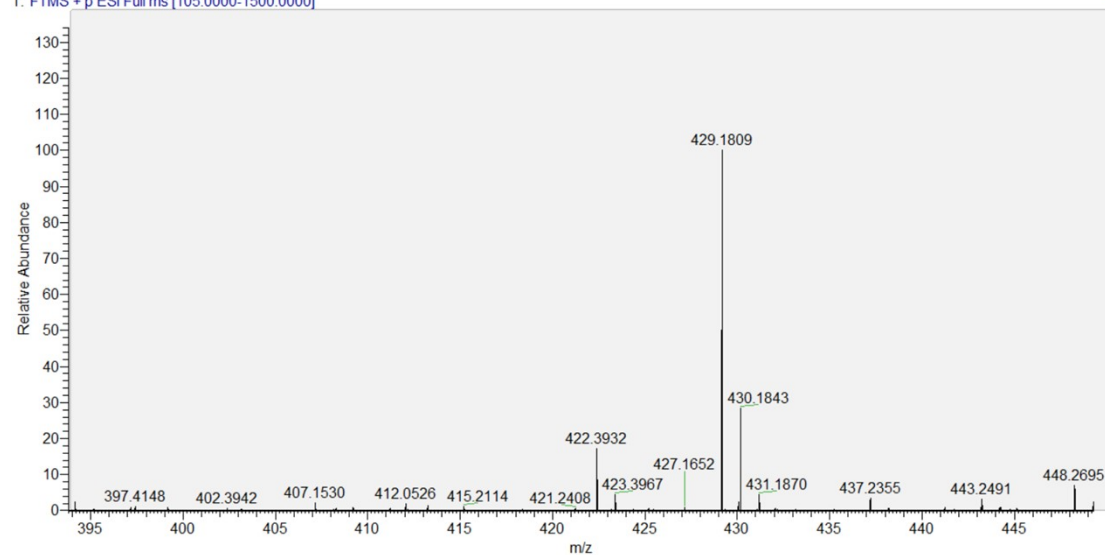

### Mass spectrometry of 10s

YYY-20 #17-28 RT: 0.07-0.12 AV: 12 NL: 1.71E9  
T: FTMS + p ESI Full ms [105.0000-1500.0000]

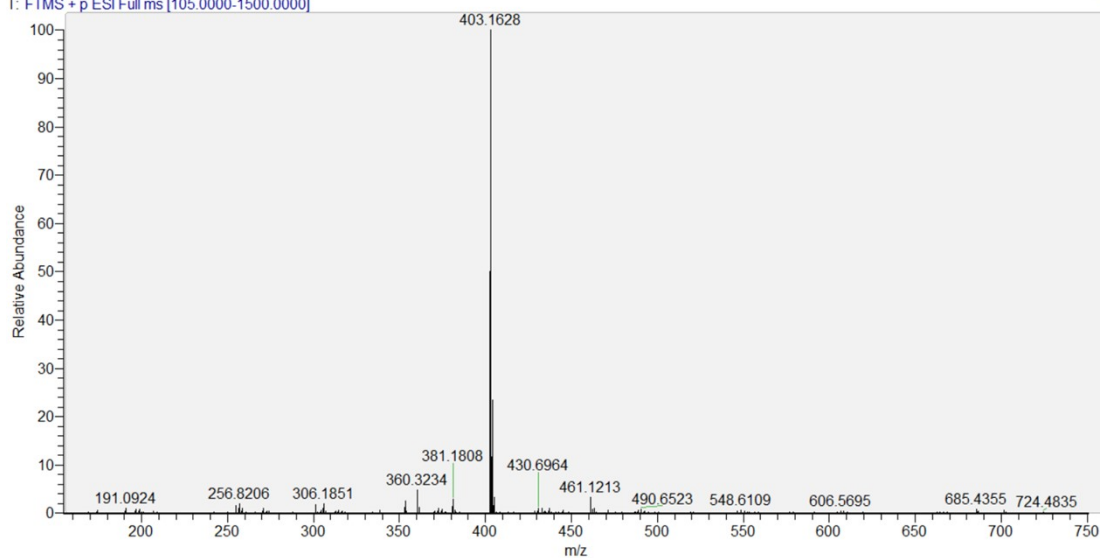

### Mass spectrometry of 10t

YYY-21 #16-29 RT: 0.07-0.13 AV: 14 NL: 1.09E9  
T: FTMS + p ESI Full ms [105.0000-1500.0000]

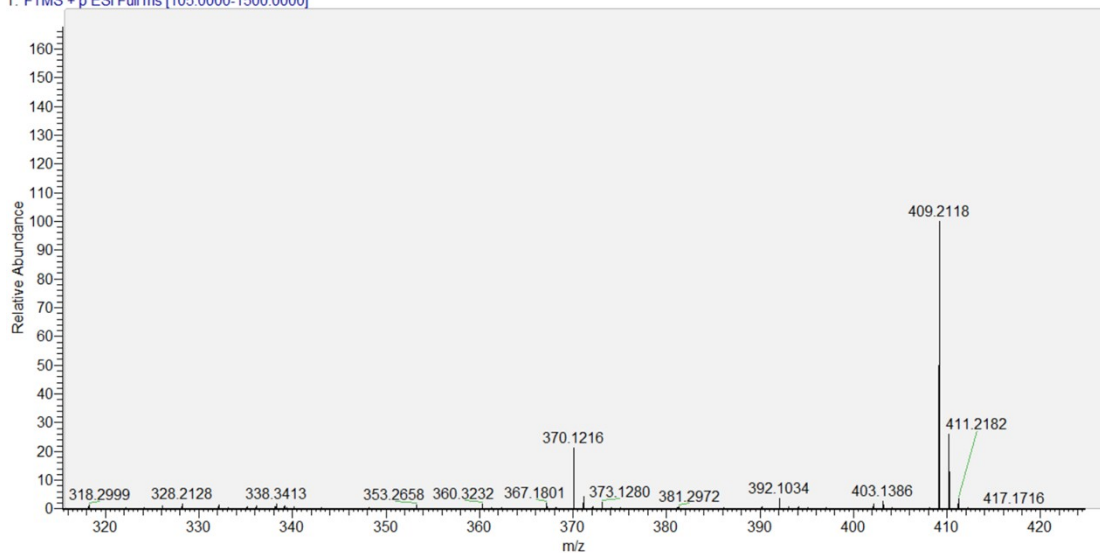

## Mass spectrometry of 10u

ZXX41 #18-28 RT: 0.08-0.12 AV: 11 NL: 2.52E9  
T: FTMS → p ESI Full ms [105.0000-1500.0000]

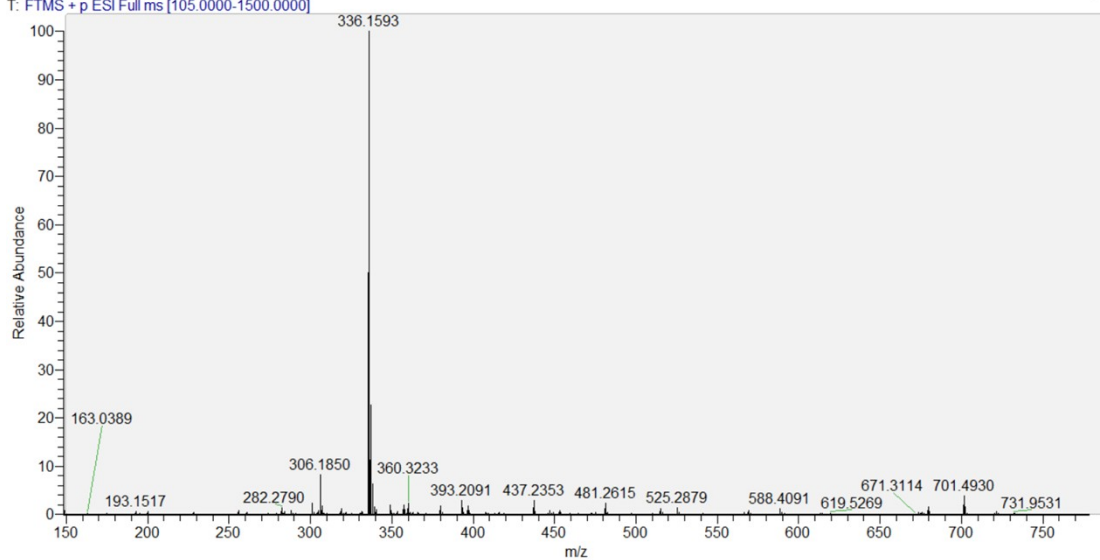

## Mass spectrometry of 10v

ZXX27 #30-40 RT: 0.13-0.18 AV: 11 NL: 8.51E6  
T: FTMS → p ESI Full ms [105.0000-1500.0000]

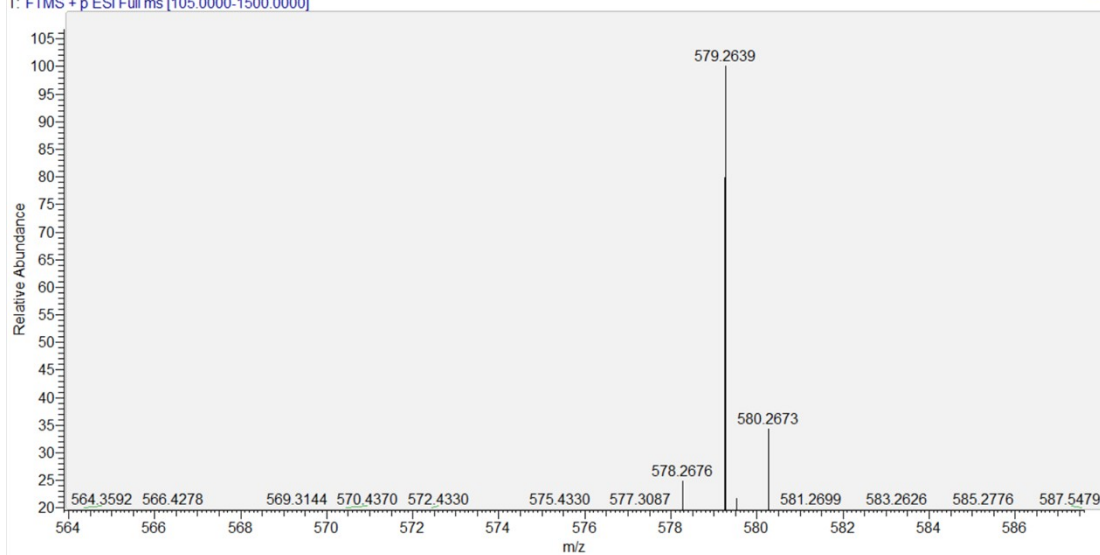



## 4. HPLC spectrum of 10v

Instrument: Agilent 1290

Detector: UV (254 nM)

Column SB-C18 (25 cm × 0.46 cm, 5 μm)

Eluent: CH<sub>3</sub>OH/H<sub>2</sub>O (80/20 to 95/5, v/v), containing 0.1% formic acid.

Flow rate: 1.0 mL/min

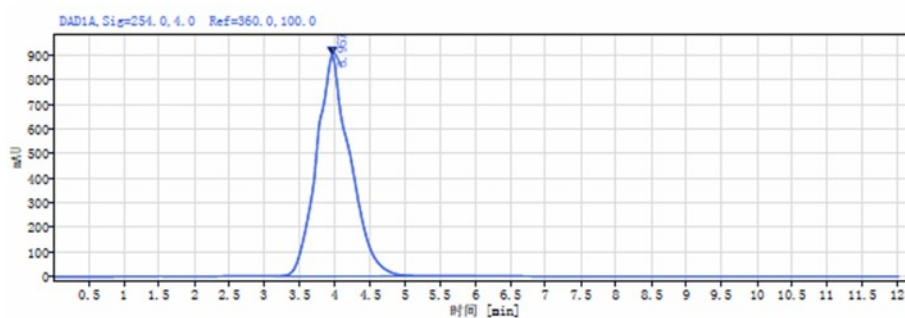

Integration Results for DAD1A, Sig=254.0, 4.0 Ref=360.0, 100.0

| Peak | RetTime | Area     | %Area | Height | Type |
|------|---------|----------|-------|--------|------|
| 1    | 3.957   | 29884.57 | 100%  | 895.12 | VB   |
